# Supplementary material
Source: publisher figshare collection journal article supplement (https://gsajournals.figshare.com/ndownloader/files/23856839)
Supplement: Supplementary file 1 [file 23856839]

## Sheet: SNP_num>=10
sperm	oocyte	8cell	morula	ICM	PGC7wm	PGC10wm	PGC10wf	PGC11wm	PGC11wf	PGC13wm	PGC17wf	PGC19wm	pattern_number	SNP_number	SNP_density
High_Met	High_Met	High_Met	High_Met	Met	High_Met	Met	High_Met	High_Met	High_Met	High_Met	High_Met	Met	21	10	0.47619
High_Met	High_Met	Met	Unmet	Met	Met	Met	Met	Met	Met	Met	Met	Met	31	14	0.451613
High_Met	High_Met	High_Met	High_Met	High_Met	High_Met	High_Met	Met	High_Met	High_Met	High_Met	High_Met	Met	32	14	0.4375
High_Met	Unmet	Met	Met	Met	Met	Met	Unmet	Unmet	Met	Unmet	Met	Unmet	28	12	0.428571
High_Met	High_Met	Met	Met	Met	High_Met	High_Met	High_Met	Met	High_Met	Met	High_Met	High_Met	24	10	0.416667
High_Met	High_Met	Met	High_Met	Met	High_Met	High_Met	High_Met	High_Met	High_Met	Met	High_Met	High_Met	44	18	0.409091
High_Met	Met	High_Met	Met	High_Met	High_Met	High_Met	High_Met	High_Met	High_Met	High_Met	High_Met	High_Met	27	11	0.407407
High_Met	High_Met	Unmet	Met	Met	Met	Unmet	Unmet	Unmet	Met	Unmet	Met	Unmet	32	13	0.40625
High_Met	High_Met	High_Met	High_Met	Met	High_Met	High_Met	High_Met	High_Met	High_Met	Met	High_Met	High_Met	90	36	0.4
High_Met	High_Met	Met	Met	Met	Met	Met	Unmet	Met	Unmet	Met	Met	Met	30	12	0.4
High_Met	High_Met	High_Met	Met	Met	Met	Unmet	Unmet	Met	Met	Met	Met	Met	28	11	0.392857
High_Met	High_Met	High_Met	Met	Met	High_Met	High_Met	High_Met	Met	High_Met	High_Met	High_Met	High_Met	48	18	0.375
High_Met	High_Met	Met	High_Met	Met	Met	Met	Unmet	Unmet	Unmet	Met	Unmet	Unmet	40	15	0.375
High_Met	High_Met	High_Met	High_Met	Met	High_Met	Met	High_Met	High_Met	High_Met	High_Met	High_Met	High_Met	70	26	0.371429
High_Met	Unmet	Met	Met	Unmet	Unmet	Unmet	Unmet	Met	Unmet	Unmet	Unmet	Unmet	41	15	0.365854
High_Met	High_Met	High_Met	Met	Met	High_Met	Met	High_Met	High_Met	High_Met	High_Met	High_Met	High_Met	56	20	0.357143
High_Met	High_Met	Met	Met	Unmet	Unmet	Met	Unmet	Unmet	Met	Unmet	Unmet	Unmet	31	11	0.354839
High_Met	High_Met	High_Met	Met	Unmet	Met	Unmet	Unmet	Unmet	Unmet	Unmet	Met	Unmet	34	12	0.352941
High_Met	Met	Met	High_Met	High_Met	High_Met	High_Met	High_Met	High_Met	High_Met	High_Met	High_Met	High_Met	34	12	0.352941
High_Met	Met	Met	Met	Met	Met	Met	Unmet	Unmet	Met	Met	Met	Unmet	34	12	0.352941
High_Met	High_Met	Met	Met	Met	Met	Met	High_Met	Met	Met	Met	Met	Met	54	19	0.351852
High_Met	High_Met	High_Met	High_Met	Met	High_Met	High_Met	High_Met	Met	High_Met	High_Met	High_Met	Met	29	10	0.344828
High_Met	Met	Unmet	Unmet	Unmet	Met	Met	Met	Unmet	Unmet	Unmet	Unmet	Unmet	29	10	0.344828
High_Met	Met	High_Met	High_Met	Met	Met	Met	Met	Met	Met	Met	Met	Met	29	10	0.344828
High_Met	Met	Met	Met	Met	Met	Unmet	Unmet	Unmet	Met	Met	Unmet	Unmet	29	10	0.344828
High_Met	Met	Met	Met	Met	Met	Met	Unmet	Met	Met	Met	Met	Unmet	41	14	0.341463
High_Met	Unmet	Unmet	Unmet	Unmet	Met	Unmet	Unmet	Met	Unmet	Unmet	Unmet	Unmet	97	33	0.340206
High_Met	Met	Unmet	Met	Met	Met	Met	Met	Met	Met	Met	Met	Met	53	18	0.339623
High_Met	High_Met	High_Met	High_Met	Met	High_Met	High_Met	High_Met	High_Met	High_Met	High_Met	Met	High_Met	36	12	0.333333
High_Met	High_Met	High_Met	Met	Met	Met	Met	Unmet	Unmet	Met	Met	Met	Met	30	10	0.333333
High_Met	High_Met	Met	High_Met	Met	Met	Met	Unmet	Met	Met	Unmet	Met	Met	30	10	0.333333
High_Met	Met	Met	High_Met	High_Met	Unmet	Unmet	Unmet	Unmet	Unmet	Unmet	Unmet	Unmet	70	23	0.328571
High_Met	High_Met	High_Met	Met	Met	Met	Met	Unmet	Unmet	Unmet	Met	Met	Unmet	52	17	0.326923
High_Met	High_Met	Met	Met	Met	Met	Unmet	Unmet	Met	Unmet	Met	Unmet	Unmet	40	13	0.325
High_Met	High_Met	High_Met	Met	Met	Unmet	Unmet	Met	Unmet	Met	Unmet	Unmet	Unmet	34	11	0.323529
High_Met	High_Met	High_Met	Met	Met	Met	Unmet	Unmet	Met	Met	Unmet	Met	Unmet	34	11	0.323529
High_Met	High_Met	Met	Met	Met	Met	Met	Met	Unmet	Unmet	Unmet	Met	Met	34	11	0.323529
High_Met	Met	High_Met	Met	Met	Unmet	Unmet	Unmet	Unmet	Unmet	Unmet	Unmet	Met	34	11	0.323529
High_Met	High_Met	Met	Met	Met	Met	Unmet	Unmet	Unmet	Met	Unmet	Unmet	Met	62	20	0.322581
High_Met	High_Met	Met	Met	Met	Met	Unmet	Unmet	Met	Met	Met	Met	Met	31	10	0.322581
High_Met	High_Met	High_Met	High_Met	Met	High_Met	High_Met	Met	High_Met	High_Met	High_Met	High_Met	High_Met	56	18	0.321429
High_Met	High_Met	Met	Met	Met	Met	Unmet	Unmet	Unmet	Met	Unmet	Met	Met	47	15	0.319149
High_Met	Met	Met	Unmet	Unmet	Met	Met	Unmet	Unmet	Unmet	Unmet	Met	Unmet	44	14	0.318182
High_Met	High_Met	Unmet	Met	Met	High_Met	High_Met	High_Met	High_Met	High_Met	High_Met	High_Met	High_Met	38	12	0.315789
High_Met	High_Met	Met	Met	Met	High_Met	High_Met	High_Met	High_Met	High_Met	High_Met	High_Met	Met	57	18	0.315789
High_Met	High_Met	High_Met	Met	Met	Met	Met	Unmet	Unmet	Met	Met	Unmet	Unmet	54	17	0.314815
High_Met	High_Met	Met	High_Met	Met	Met	Met	Met	Met	Met	Met	High_Met	Met	35	11	0.314286
High_Met	High_Met	High_Met	High_Met	Met	High_Met	High_Met	High_Met	Met	High_Met	High_Met	High_Met	High_Met	51	16	0.313725
High_Met	High_Met	High_Met	Unmet	Met	Unmet	Unmet	Unmet	Unmet	Unmet	Unmet	Met	Unmet	48	15	0.3125
High_Met	High_Met	High_Met	Met	High_Met	High_Met	High_Met	High_Met	High_Met	High_Met	High_Met	High_Met	Met	32	10	0.3125
High_Met	High_Met	High_Met	Met	Met	Met	Met	Unmet	Unmet	Met	Unmet	Unmet	Met	32	10	0.3125
High_Met	High_Met	High_Met	Met	Met	Met	Met	Met	Met	Unmet	Met	Met	Met	32	10	0.3125
High_Met	High_Met	Met	Met	Met	High_Met	High_Met	High_Met	High_Met	High_Met	High_Met	High_Met	High_Met	508	156	0.307087
High_Met	Met	Unmet	Met	Unmet	Met	Unmet	Unmet	Unmet	Met	Unmet	Unmet	Unmet	85	26	0.305882
High_Met	High_Met	High_Met	Met	Met	Met	Unmet	Unmet	Unmet	Met	Met	Met	Unmet	36	11	0.305556
High_Met	High_Met	High_Met	High_Met	High_Met	High_Met	High_Met	High_Met	Met	High_Met	High_Met	High_Met	High_Met	79	24	0.303797
High_Met	High_Met	High_Met	High_Met	Met	Met	Met	Met	Unmet	Met	Met	Met	Unmet	33	10	0.30303
High_Met	High_Met	High_Met	Met	Met	Unmet	Met	Unmet	Unmet	Unmet	Unmet	Unmet	Met	33	10	0.30303
High_Met	High_Met	Met	Met	Met	Met	Met	Unmet	Unmet	Met	Unmet	Met	Met	63	19	0.301587
High_Met	High_Met	High_Met	High_Met	Met	Met	Met	Unmet	Met	Met	Unmet	Met	Met	40	12	0.3
High_Met	Unmet	Unmet	Met	Unmet	Met	Met	Unmet	Unmet	Met	Unmet	Unmet	Unmet	40	12	0.3
High_Met	High_Met	High_Met	Met	Met	Met	Met	Met	Unmet	Met	Unmet	Unmet	Unmet	40	12	0.3
High_Met	High_Met	Met	Met	Met	Unmet	Met	Unmet	Unmet	Unmet	Met	Unmet	Unmet	80	24	0.3
High_Met	Unmet	High_Met	Met	Met	Met	Unmet	Unmet	Unmet	Unmet	Unmet	Unmet	Unmet	47	14	0.297872
High_Met	High_Met	High_Met	Met	Met	Met	Met	Met	Unmet	Met	Met	Met	Met	51	15	0.294118
High_Met	High_Met	Met	Met	Met	High_Met	High_Met	High_Met	Met	High_Met	High_Met	High_Met	Met	34	10	0.294118
High_Met	High_Met	Met	Met	Met	Met	Unmet	Met	Met	Unmet	Unmet	Unmet	Unmet	34	10	0.294118
High_Met	High_Met	Met	Met	Met	Met	Met	Unmet	Unmet	Met	Unmet	Unmet	Met	51	15	0.294118
High_Met	Met	Unmet	Met	Met	Met	Met	Unmet	Unmet	Unmet	Unmet	Met	Unmet	34	10	0.294118
High_Met	High_Met	Met	High_Met	Met	Met	Unmet	Unmet	Unmet	Met	Unmet	Met	Unmet	75	22	0.293333
High_Met	Met	Met	Met	Unmet	Met	Unmet	Unmet	Unmet	Met	Unmet	Unmet	Unmet	75	22	0.293333
High_Met	High_Met	High_Met	Met	Unmet	Met	Met	Unmet	Unmet	Unmet	Unmet	Unmet	Unmet	41	12	0.292683
High_Met	High_Met	Met	Met	Met	Met	Met	Met	Met	Met	High_Met	Met	Met	41	12	0.292683
High_Met	Met	Met	High_Met	Met	High_Met	High_Met	High_Met	High_Met	High_Met	High_Met	High_Met	High_Met	41	12	0.292683
High_Met	High_Met	Met	High_Met	Met	High_Met	High_Met	High_Met	High_Met	High_Met	High_Met	High_Met	High_Met	370	108	0.291892
High_Met	Met	Met	Met	Met	High_Met	Met	Met	Met	Met	Met	Met	Met	48	14	0.291667
High_Met	Met	Met	Met	Unmet	Unmet	Unmet	Unmet	Unmet	Unmet	Unmet	Unmet	Met	69	20	0.289855
High_Met	High_Met	Met	Met	Unmet	Met	Met	Unmet	Unmet	Met	Unmet	Unmet	Unmet	38	11	0.289474
High_Met	High_Met	Met	Met	Met	Met	Met	Met	Unmet	Unmet	Unmet	Met	Unmet	90	26	0.288889
High_Met	Met	Met	High_Met	Met	Met	Met	Met	Met	Met	Met	Met	Met	45	13	0.288889
High_Met	High_Met	High_Met	High_Met	High_Met	High_Met	Met	High_Met	High_Met	High_Met	High_Met	High_Met	High_Met	66	19	0.287879
High_Met	High_Met	High_Met	High_Met	High_Met	High_Met	High_Met	Met	High_Met	High_Met	High_Met	High_Met	High_Met	94	27	0.287234
High_Met	High_Met	High_Met	Met	High_Met	High_Met	High_Met	High_Met	High_Met	High_Met	High_Met	High_Met	High_Met	286	82	0.286713
High_Met	High_Met	High_Met	Met	Met	Met	Met	Met	Met	High_Met	Met	Met	Met	49	14	0.285714
High_Met	High_Met	Met	Met	Met	High_Met	Met	Met	Met	High_Met	Met	Met	Met	42	12	0.285714
High_Met	Met	High_Met	Met	Met	Unmet	Unmet	Unmet	Unmet	Unmet	Met	Unmet	Unmet	35	10	0.285714
High_Met	High_Met	High_Met	High_Met	High_Met	High_Met	High_Met	High_Met	High_Met	High_Met	Met	High_Met	High_Met	88	25	0.284091
High_Met	High_Met	Met	Met	Met	High_Met	High_Met	High_Met	Met	High_Met	High_Met	High_Met	High_Met	60	17	0.283333
High_Met	High_Met	Met	Met	High_Met	Met	Unmet	Unmet	Unmet	Unmet	Met	Unmet	Unmet	46	13	0.282609
High_Met	Met	Met	Met	Met	Met	Met	Unmet	Met	Unmet	Unmet	Unmet	Unmet	39	11	0.282051
High_Met	High_Met	High_Met	High_Met	High_Met	High_Met	High_Met	High_Met	High_Met	High_Met	High_Met	Met	High_Met	50	14	0.28
High_Met	Met	Met	Met	Unmet	Met	Met	Unmet	Unmet	Unmet	Unmet	Unmet	Unmet	125	35	0.28
High_Met	Met	Met	Met	Met	High_Met	High_Met	High_Met	High_Met	High_Met	High_Met	High_Met	High_Met	50	14	0.28
High_Met	High_Met	High_Met	Met	Met	High_Met	Met	Met	Met	Met	Met	Met	Met	68	19	0.279412
High_Met	High_Met	Met	Met	Met	Met	Unmet	Unmet	Met	Met	Met	Met	Unmet	43	12	0.27907
High_Met	Met	Met	Met	Unmet	Unmet	Unmet	Unmet	Met	Unmet	Unmet	Unmet	Unmet	43	12	0.27907
High_Met	High_Met	Met	Met	Met	Met	Met	Unmet	Met	Met	Met	Met	Met	162	45	0.277778
Met	High_Met	High_Met	High_Met	Met	Unmet	Unmet	Unmet	Unmet	Unmet	Unmet	Unmet	Unmet	47	13	0.276596
High_Met	Met	Met	Met	Unmet	Met	Unmet	Unmet	Unmet	Unmet	Met	Unmet	Unmet	40	11	0.275
High_Met	High_Met	High_Met	High_Met	Met	Unmet	Met	Unmet	Unmet	Unmet	Unmet	Met	Unmet	51	14	0.27451
High_Met	High_Met	High_Met	High_Met	Met	High_Met	Met	Met	Met	Met	Met	Met	Met	73	20	0.273973
High_Met	High_Met	Unmet	High_Met	Met	Unmet	Unmet	Unmet	Unmet	Unmet	Unmet	Met	Unmet	37	10	0.27027
High_Met	High_Met	High_Met	Met	Met	Met	Met	Unmet	Unmet	Met	Unmet	Met	Met	37	10	0.27027
High_Met	High_Met	High_Met	Met	Met	High_Met	High_Met	High_Met	High_Met	High_Met	High_Met	High_Met	Met	67	18	0.268657
High_Met	High_Met	Met	Met	Unmet	Met	Unmet	Unmet	Unmet	Met	Unmet	Unmet	Unmet	120	32	0.266667
High_Met	High_Met	High_Met	Met	Met	Met	Met	Met	Met	Met	Met	Met	Met	320	85	0.265625
High_Met	High_Met	Met	Met	Met	Met	Met	Unmet	Met	Unmet	Unmet	Met	Unmet	64	17	0.265625
High_Met	High_Met	Met	High_Met	Met	Unmet	Unmet	Unmet	Unmet	Met	Unmet	Met	Unmet	49	13	0.265306
High_Met	Met	Unmet	Unmet	Unmet	Met	Met	Met	Met	Met	Met	Met	Met	49	13	0.265306
High_Met	High_Met	High_Met	High_Met	Met	Met	Met	Met	Met	High_Met	Met	Met	Met	53	14	0.264151
High_Met	High_Met	Met	Met	Met	Met	Met	Met	Unmet	Met	Met	Met	Unmet	91	24	0.263736
High_Met	High_Met	Met	Met	Met	Met	Met	Met	Met	Met	Unmet	Met	Met	148	39	0.263514
High_Met	High_Met	High_Met	Met	Met	Met	Met	Met	Unmet	Met	Met	Met	Unmet	38	10	0.263158
High_Met	High_Met	Unmet	Met	Met	Met	Met	Met	Met	Met	Met	Met	Met	57	15	0.263158
High_Met	High_Met	High_Met	Met	Met	Met	Met	Met	Met	Met	Unmet	Met	Unmet	61	16	0.262295
High_Met	High_Met	Met	High_Met	High_Met	High_Met	High_Met	High_Met	High_Met	High_Met	High_Met	High_Met	High_Met	374	98	0.262032
High_Met	Unmet	Unmet	Met	Unmet	Met	Unmet	Unmet	Unmet	Unmet	Unmet	Unmet	Met	42	11	0.261905
High_Met	High_Met	Met	Met	Met	Met	Met	Met	Met	Met	Met	High_Met	Met	84	22	0.261905
High_Met	High_Met	High_Met	High_Met	Met	Met	Met	Met	Unmet	Met	Unmet	Met	Unmet	46	12	0.26087
High_Met	High_Met	Met	High_Met	Met	Met	Met	Met	Met	Met	Unmet	Met	Met	46	12	0.26087
High_Met	Unmet	Met	High_Met	Met	Unmet	Unmet	Unmet	Unmet	Unmet	Unmet	Unmet	Unmet	54	14	0.259259
High_Met	Unmet	Unmet	Met	Met	Unmet	Unmet	Unmet	Unmet	Unmet	Unmet	Unmet	Met	58	15	0.258621
High_Met	High_Met	High_Met	Met	Met	Met	Met	Met	Unmet	Met	Unmet	Met	Unmet	58	15	0.258621
High_Met	Met	Unmet	Unmet	Unmet	Met	Unmet	Unmet	Unmet	Met	Unmet	Met	Unmet	58	15	0.258621
High_Met	Unmet	Met	Unmet	Unmet	Met	Unmet	Unmet	Unmet	Unmet	Unmet	Met	Unmet	175	45	0.257143
High_Met	Met	Unmet	Unmet	Unmet	Unmet	Met	Unmet	Unmet	Unmet	Unmet	Met	Unmet	70	18	0.257143
High_Met	High_Met	Unmet	High_Met	Met	Unmet	Met	Unmet	Unmet	Unmet	Unmet	Unmet	Unmet	39	10	0.25641
High_Met	Unmet	Unmet	Met	Unmet	Met	Unmet	Met	Unmet	Unmet	Unmet	Unmet	Unmet	39	10	0.25641
High_Met	High_Met	Met	High_Met	Unmet	Unmet	Unmet	Unmet	Unmet	Met	Unmet	Unmet	Unmet	39	10	0.25641
High_Met	Unmet	Met	Unmet	Unmet	Unmet	Unmet	Unmet	Unmet	Unmet	Met	Unmet	Unmet	160	41	0.25625
High_Met	Met	Met	Met	Met	Unmet	Met	Unmet	Unmet	Met	Unmet	Unmet	Unmet	43	11	0.255814
High_Met	High_Met	High_Met	Met	Met	High_Met	High_Met	High_Met	High_Met	High_Met	Met	High_Met	High_Met	47	12	0.255319
High_Met	High_Met	Met	Met	Met	High_Met	High_Met	High_Met	Met	High_Met	Met	High_Met	Met	47	12	0.255319
High_Met	High_Met	High_Met	High_Met	Met	Met	Met	Met	Met	Met	Unmet	Met	Met	51	13	0.254902
High_Met	High_Met	Met	High_Met	High_Met	Met	Met	Met	Met	Met	Met	Met	Met	55	14	0.254545
High_Met	Met	Unmet	Unmet	Unmet	Met	Met	Unmet	Unmet	Met	Unmet	Unmet	Unmet	55	14	0.254545
High_Met	High_Met	Met	Met	Met	Met	Unmet	Met	Unmet	Met	Unmet	Met	Unmet	75	19	0.253333
High_Met	Met	Met	Met	High_Met	Met	Unmet	Unmet	Unmet	Unmet	Unmet	Unmet	Unmet	75	19	0.253333
High_Met	High_Met	Met	Unmet	Met	Met	Met	Unmet	Unmet	Unmet	Unmet	Unmet	Unmet	79	20	0.253165
High_Met	High_Met	High_Met	High_Met	Met	High_Met	High_Met	High_Met	High_Met	High_Met	High_Met	High_Met	High_Met	739	186	0.251691
High_Met	Unmet	Unmet	Unmet	Unmet	Unmet	Met	Unmet	Unmet	Unmet	Met	Unmet	Unmet	44	11	0.25
High_Met	Unmet	Unmet	Unmet	Unmet	Met	Met	Met	Met	Met	Met	Met	Met	52	13	0.25
High_Met	Unmet	Unmet	Met	Met	Unmet	Unmet	Unmet	Unmet	Unmet	Met	Unmet	Unmet	44	11	0.25
High_Met	High_Met	Unmet	Met	Met	Unmet	Unmet	Met	Unmet	Unmet	Unmet	Unmet	Unmet	64	16	0.25
High_Met	High_Met	High_Met	Met	Met	Met	Met	Met	Met	Met	Unmet	Met	Met	64	16	0.25
High_Met	Unmet	Met	Unmet	Unmet	Unmet	Met	Unmet	Unmet	Unmet	Unmet	Met	Unmet	52	13	0.25
High_Met	High_Met	Met	Unmet	Met	Met	Unmet	Unmet	Unmet	Unmet	Unmet	Met	Unmet	84	21	0.25
High_Met	High_Met	Met	Met	Met	High_Met	High_Met	Met	High_Met	High_Met	High_Met	High_Met	High_Met	68	17	0.25
High_Met	High_Met	Met	Met	Met	High_Met	Met	High_Met	Met	High_Met	Met	High_Met	Met	40	10	0.25
High_Met	High_Met	Met	Met	Met	High_Met	Met	Met	Met	Met	Met	High_Met	Met	44	11	0.25
High_Met	High_Met	Met	Met	Met	Met	Unmet	Unmet	Unmet	Met	Met	Met	Unmet	60	15	0.25
High_Met	High_Met	Met	Met	Met	Met	Met	Met	Met	Met	Met	Met	Unmet	168	42	0.25
High_Met	Met	Met	Met	Met	Met	Met	Met	Met	High_Met	Met	Met	Met	48	12	0.25
High_Met	High_Met	Met	Met	Met	Met	Met	Unmet	Met	Met	Unmet	Met	Unmet	97	24	0.247423
High_Met	High_Met	Met	Met	Met	Met	Unmet	Unmet	Met	Met	Unmet	Unmet	Unmet	85	21	0.247059
High_Met	Unmet	Unmet	Unmet	Unmet	Met	Met	Unmet	Unmet	Met	Unmet	Unmet	Unmet	77	19	0.246753
High_Met	Unmet	Met	Unmet	Met	Unmet	Unmet	Unmet	Unmet	Met	Unmet	Unmet	Unmet	77	19	0.246753
High_Met	High_Met	Met	High_Met	Met	Met	Met	Met	Met	Met	Met	Met	Unmet	73	18	0.246575
High_Met	High_Met	High_Met	Met	Met	Met	Met	Unmet	Met	Unmet	Unmet	Unmet	Unmet	69	17	0.246377
High_Met	Met	Unmet	Unmet	Met	Met	Unmet	Unmet	Unmet	Unmet	Unmet	Met	Unmet	69	17	0.246377
High_Met	High_Met	Met	High_Met	Unmet	Unmet	Unmet	Unmet	Unmet	Unmet	Unmet	Met	Unmet	61	15	0.245902
High_Met	High_Met	Met	Met	Met	Unmet	Unmet	Unmet	Unmet	Met	Met	Unmet	Unmet	61	15	0.245902
High_Met	High_Met	Met	Met	Met	Met	Met	Unmet	Unmet	Met	Met	Met	Met	57	14	0.245614
High_Met	High_Met	High_Met	Met	Met	Met	Unmet	Unmet	Unmet	Met	Met	Unmet	Unmet	49	12	0.244898
High_Met	High_Met	Met	Met	Met	Met	Unmet	Met	Met	Met	Met	Met	Met	49	12	0.244898
High_Met	Unmet	Unmet	Met	Unmet	Met	Met	Unmet	Unmet	Unmet	Unmet	Met	Unmet	45	11	0.244444
High_Met	High_Met	Met	High_Met	Met	Unmet	Unmet	Unmet	Unmet	Unmet	Met	Unmet	Unmet	180	44	0.244444
High_Met	Unmet	Met	Met	Unmet	Unmet	Unmet	Unmet	Unmet	Unmet	Unmet	Unmet	Met	78	19	0.24359
High_Met	High_Met	High_Met	High_Met	Met	Met	Met	Unmet	Met	Met	Met	Met	Met	74	18	0.243243
High_Met	High_Met	Met	Met	Met	Met	Met	Unmet	Met	Met	Unmet	Met	Met	74	18	0.243243
High_Met	Met	Unmet	Met	Met	Unmet	Unmet	Unmet	Unmet	Met	Unmet	Unmet	Unmet	66	16	0.242424
High_Met	High_Met	Met	Met	Met	High_Met	High_Met	High_Met	High_Met	High_Met	Met	High_Met	High_Met	62	15	0.241935
High_Met	High_Met	Met	Met	Met	High_Met	Met	High_Met	High_Met	High_Met	High_Met	High_Met	High_Met	62	15	0.241935
High_Met	High_Met	Met	Met	Met	Met	Unmet	Unmet	Met	Met	Unmet	Met	Unmet	62	15	0.241935
High_Met	Met	Met	Met	Met	Met	Met	Unmet	Met	Met	Met	Met	Met	83	20	0.240964
High_Met	High_Met	Met	Met	Unmet	High_Met	High_Met	High_Met	High_Met	High_Met	High_Met	High_Met	High_Met	54	13	0.240741
High_Met	Met	High_Met	High_Met	Met	Met	Unmet	Unmet	Unmet	Unmet	Unmet	Unmet	Unmet	108	26	0.240741
High_Met	High_Met	High_Met	High_Met	Met	High_Met	High_Met	High_Met	High_Met	High_Met	High_Met	High_Met	Met	79	19	0.240506
High_Met	Unmet	Met	Met	Met	Unmet	Unmet	Unmet	Unmet	Unmet	Met	Unmet	Unmet	50	12	0.24
High_Met	Met	High_Met	Met	Met	Met	Met	Met	Met	Met	Met	Met	Met	75	18	0.24
High_Met	High_Met	Unmet	Met	Unmet	Met	Unmet	Unmet	Unmet	Unmet	Unmet	Met	Unmet	46	11	0.23913
High_Met	High_Met	Met	High_Met	Met	Met	Unmet	Unmet	Unmet	Unmet	Met	Unmet	Unmet	138	33	0.23913
High_Met	High_Met	Met	Met	Met	Met	Met	Unmet	Unmet	Unmet	Unmet	Unmet	Met	92	22	0.23913
High_Met	High_Met	High_Met	High_Met	Met	Met	Met	Unmet	Unmet	Met	Unmet	Met	Unmet	67	16	0.238806
High_Met	Met	Unmet	Met	Met	Met	Unmet	Unmet	Unmet	Met	Unmet	Unmet	Unmet	67	16	0.238806
High_Met	High_Met	Met	High_Met	High_Met	Unmet	Unmet	Unmet	Unmet	Met	Unmet	Unmet	Unmet	42	10	0.238095
High_Met	Met	Met	Met	Unmet	Met	Met	Met	Met	Met	Met	Met	Met	76	18	0.236842
High_Met	Met	Met	Met	Met	Met	Met	Unmet	Unmet	Met	Unmet	Unmet	Unmet	76	18	0.236842
High_Met	Unmet	Unmet	Unmet	Met	Unmet	Unmet	Met	Unmet	Unmet	Unmet	Unmet	Unmet	93	22	0.236559
High_Met	High_Met	High_Met	Met	Met	Unmet	Unmet	Unmet	Met	Unmet	Unmet	Unmet	Unmet	157	37	0.235669
Unmet	High_Met	Met	Met	Met	High_Met	High_Met	High_Met	High_Met	High_Met	High_Met	High_Met	High_Met	47	11	0.234043
High_Met	High_Met	Met	High_Met	Met	Unmet	Unmet	Unmet	Unmet	Met	Unmet	Unmet	Unmet	308	72	0.233766
High_Met	High_Met	Met	Met	Met	Met	Met	Met	Unmet	Met	Unmet	Met	Met	77	18	0.233766
High_Met	Met	Met	Met	Met	Unmet	Unmet	Unmet	Met	Unmet	Unmet	Unmet	Unmet	77	18	0.233766
High_Met	High_Met	High_Met	High_Met	Met	Met	Met	Unmet	Unmet	Unmet	Unmet	Unmet	Unmet	330	77	0.233333
High_Met	Met	High_Met	High_Met	Met	High_Met	High_Met	High_Met	High_Met	High_Met	High_Met	High_Met	High_Met	73	17	0.232877
High_Met	High_Met	High_Met	High_Met	High_Met	High_Met	High_Met	High_Met	High_Met	High_Met	High_Met	High_Met	Met	116	27	0.232759
High_Met	High_Met	Met	High_Met	Met	Met	Met	Unmet	Met	Met	Unmet	Met	Unmet	43	10	0.232558
High_Met	High_Met	High_Met	Met	Met	Met	Unmet	Unmet	Unmet	Unmet	Unmet	Unmet	Met	142	33	0.232394
High_Met	Unmet	Unmet	Met	Unmet	Met	Unmet	Unmet	Unmet	Met	Unmet	Unmet	Unmet	112	26	0.232143
High_Met	Unmet	Unmet	Met	Met	Met	Unmet	Unmet	Unmet	Met	Unmet	Unmet	Unmet	69	16	0.231884
High_Met	High_Met	Met	Met	Unmet	Unmet	Unmet	Unmet	Met	Unmet	Unmet	Unmet	Unmet	82	19	0.231707
High_Met	High_Met	High_Met	High_Met	High_Met	High_Met	High_Met	High_Met	High_Met	High_Met	High_Met	High_Met	High_Met	1344	311	0.231399
High_Met	High_Met	High_Met	Met	Met	Met	Met	Unmet	Met	Met	Met	Met	Met	96	22	0.229167
High_Met	Met	Met	Met	Unmet	Unmet	Met	Unmet	Unmet	Unmet	Unmet	Unmet	Unmet	271	62	0.228782
High_Met	High_Met	Met	Met	Met	Met	Met	Met	Met	Met	Met	Met	Met	564	129	0.228723
High_Met	High_Met	Unmet	Met	Met	Unmet	Unmet	Unmet	Unmet	Unmet	Met	Unmet	Unmet	105	24	0.228571
High_Met	High_Met	High_Met	Met	Unmet	Unmet	Unmet	Unmet	Unmet	Unmet	Unmet	Met	Unmet	149	34	0.228188
High_Met	High_Met	High_Met	Met	Met	High_Met	High_Met	High_Met	High_Met	High_Met	High_Met	High_Met	High_Met	452	103	0.227876
High_Met	High_Met	Unmet	Unmet	Unmet	Unmet	Unmet	Unmet	Unmet	Met	Unmet	Unmet	Unmet	44	10	0.227273
High_Met	High_Met	Met	Met	Unmet	Unmet	Met	Unmet	Unmet	Unmet	Unmet	Met	Unmet	44	10	0.227273
High_Met	High_Met	Unmet	High_Met	Met	Met	Unmet	Unmet	Unmet	Unmet	Unmet	Unmet	Unmet	141	32	0.22695
High_Met	High_Met	Met	Unmet	Met	Unmet	Unmet	Unmet	Unmet	Unmet	Unmet	Met	Unmet	216	49	0.226852
High_Met	High_Met	High_Met	Met	Met	Unmet	Unmet	Met	Unmet	Unmet	Unmet	Unmet	Unmet	247	56	0.226721
High_Met	High_Met	Met	Met	Met	Met	Met	Unmet	Unmet	Met	Unmet	Met	Unmet	159	36	0.226415
High_Met	High_Met	Met	Met	Unmet	Unmet	Unmet	Unmet	Unmet	Met	Unmet	Unmet	Unmet	296	67	0.226351
High_Met	High_Met	High_Met	Met	Met	Met	Met	Met	Met	Met	Met	Met	Unmet	84	19	0.22619
High_Met	Met	Met	Unmet	Unmet	Unmet	Met	Unmet	Unmet	Unmet	Unmet	Unmet	Unmet	292	66	0.226027
High_Met	High_Met	Unmet	Unmet	Met	Unmet	Unmet	Unmet	Unmet	Unmet	Unmet	Met	Unmet	62	14	0.225806
High_Met	High_Met	Met	Met	High_Met	Met	Unmet	Unmet	Unmet	Unmet	Unmet	Met	Unmet	71	16	0.225352
High_Met	Unmet	Met	Met	Unmet	Met	Unmet	Unmet	Unmet	Unmet	Unmet	Met	Unmet	111	25	0.225225
High_Met	Met	Unmet	Met	Unmet	Unmet	Unmet	Unmet	Unmet	Met	Unmet	Unmet	Unmet	120	27	0.225
High_Met	High_Met	Met	Met	Met	Met	Met	Met	Met	High_Met	Met	Met	Met	89	20	0.224719
High_Met	Met	High_Met	Met	High_Met	Unmet	Unmet	Unmet	Unmet	Unmet	Unmet	Unmet	Unmet	89	20	0.224719
High_Met	High_Met	Met	High_Met	Met	Unmet	Unmet	Unmet	Unmet	Unmet	Unmet	Unmet	Met	156	35	0.224359
High_Met	Unmet	Met	Met	Met	Met	Met	Met	Met	Met	Met	Met	Met	58	13	0.224138
High_Met	High_Met	Met	Met	Met	Met	Met	Unmet	Unmet	Met	Unmet	Unmet	Unmet	299	67	0.22408
High_Met	High_Met	Met	Met	Unmet	Met	Met	Met	Met	Met	Met	Met	Met	76	17	0.223684
High_Met	High_Met	High_Met	High_Met	Met	Met	Unmet	Unmet	Unmet	Met	Unmet	Met	Unmet	85	19	0.223529
High_Met	Met	Met	Met	Met	Met	Unmet	Unmet	Unmet	Unmet	Unmet	Unmet	Met	85	19	0.223529
High_Met	High_Met	Met	Met	Met	Met	Met	Unmet	Unmet	Unmet	Met	Unmet	Unmet	112	25	0.223214
High_Met	Unmet	Unmet	Unmet	Unmet	Met	Unmet	Unmet	Unmet	Unmet	Unmet	Met	Unmet	400	89	0.2225
High_Met	High_Met	High_Met	Met	Met	Met	Unmet	Unmet	Unmet	Unmet	Unmet	Met	Unmet	472	105	0.222458
High_Met	Unmet	Unmet	Unmet	Unmet	Met	Unmet	Unmet	Unmet	Unmet	Met	Unmet	Unmet	153	34	0.222222
High_Met	High_Met	High_Met	Met	Met	Unmet	Unmet	Unmet	Unmet	Met	Unmet	Met	Unmet	72	16	0.222222
High_Met	Met	High_Met	Met	Met	Unmet	Met	Unmet	Unmet	Unmet	Unmet	Unmet	Unmet	117	26	0.222222
High_Met	Met	Met	Met	Met	Met	Met	Unmet	Unmet	Met	Unmet	Met	Unmet	72	16	0.222222
High_Met	Met	Met	Met	Met	Met	Met	Met	Met	Met	Unmet	Met	Unmet	45	10	0.222222
High_Met	High_Met	Unmet	Met	Met	Met	Met	Unmet	Unmet	Unmet	Unmet	Unmet	Unmet	140	31	0.221429
High_Met	Met	Unmet	Unmet	Unmet	Met	Met	Unmet	Unmet	Unmet	Unmet	Unmet	Unmet	271	60	0.221402
High_Met	Unmet	Met	Unmet	Unmet	Unmet	Unmet	Unmet	Unmet	Unmet	Unmet	Unmet	Met	154	34	0.220779
High_Met	High_Met	Unmet	Unmet	Unmet	Unmet	Met	Unmet	Unmet	Unmet	Unmet	Unmet	Unmet	127	28	0.220472
High_Met	Unmet	Unmet	Unmet	Unmet	Met	Unmet	Met	Unmet	Unmet	Unmet	Unmet	Unmet	118	26	0.220339
High_Met	High_Met	Met	High_Met	Met	Met	Unmet	Unmet	Unmet	Met	Unmet	Unmet	Unmet	236	52	0.220339
High_Met	High_Met	High_Met	High_Met	High_Met	Met	Met	Met	Met	Met	Met	Met	Unmet	50	11	0.22
High_Met	High_Met	Met	Met	Met	Met	Met	Unmet	Met	Met	Met	Unmet	Unmet	50	11	0.22
High_Met	High_Met	Met	High_Met	Unmet	Met	Unmet	Unmet	Unmet	Unmet	Unmet	Unmet	Unmet	187	41	0.219251
High_Met	High_Met	High_Met	Met	Met	Met	Unmet	Unmet	Met	Unmet	Unmet	Unmet	Unmet	128	28	0.21875
High_Met	Met	High_Met	Met	Met	Met	Unmet	Unmet	Unmet	Unmet	Unmet	Unmet	Unmet	384	84	0.21875
High_Met	Unmet	Met	Unmet	Met	Unmet	Unmet	Unmet	Unmet	Unmet	Met	Unmet	Unmet	55	12	0.218182
High_Met	Unmet	Met	Unmet	Unmet	Met	Met	Unmet	Unmet	Unmet	Unmet	Unmet	Unmet	243	53	0.218107
High_Met	High_Met	High_Met	Unmet	Met	Met	Unmet	Unmet	Unmet	Unmet	Unmet	Unmet	Unmet	124	27	0.217742
High_Met	Met	High_Met	Met	Met	High_Met	High_Met	High_Met	High_Met	High_Met	High_Met	High_Met	High_Met	46	10	0.217391
High_Met	Unmet	Met	Met	Met	Met	Unmet	Unmet	Unmet	Unmet	Unmet	Met	Unmet	106	23	0.216981
High_Met	High_Met	High_Met	High_Met	Met	Met	Met	Met	Met	Met	Met	Met	Met	272	59	0.216912
High_Met	Met	Unmet	Met	Unmet	Met	Met	Unmet	Unmet	Unmet	Unmet	Unmet	Unmet	143	31	0.216783
High_Met	Met	Met	Unmet	Unmet	Unmet	Unmet	Unmet	Unmet	Met	Unmet	Unmet	Unmet	111	24	0.216216
High_Met	High_Met	Met	Met	Met	Unmet	Met	Unmet	Unmet	Unmet	Unmet	Met	Unmet	264	57	0.215909
High_Met	Unmet	Unmet	Unmet	Met	Met	Unmet	Unmet	Unmet	Unmet	Met	Unmet	Unmet	51	11	0.215686
High_Met	Met	Met	Unmet	Met	Met	Unmet	Unmet	Unmet	Met	Unmet	Unmet	Unmet	51	11	0.215686
High_Met	Unmet	Unmet	Unmet	Met	Unmet	Met	Unmet	Unmet	Unmet	Unmet	Unmet	Unmet	320	69	0.215625
High_Met	High_Met	High_Met	Met	Met	Met	Unmet	Met	Unmet	Unmet	Unmet	Unmet	Unmet	144	31	0.215278
High_Met	High_Met	Met	High_Met	Met	Met	Met	Unmet	Unmet	Unmet	Unmet	Unmet	Unmet	391	84	0.214834
High_Met	Unmet	Unmet	Unmet	Unmet	Unmet	Unmet	Unmet	Unmet	Met	Unmet	Unmet	Unmet	764	164	0.21466
High_Met	Unmet	Met	Met	Unmet	Met	Unmet	Unmet	Unmet	Met	Unmet	Unmet	Unmet	84	18	0.214286
High_Met	Unmet	Unmet	Met	Unmet	Unmet	Unmet	Unmet	Unmet	Met	Unmet	Unmet	Unmet	243	52	0.213992
High_Met	High_Met	High_Met	Met	Met	Unmet	Unmet	Unmet	Unmet	Unmet	Unmet	Unmet	Met	318	68	0.213836
High_Met	High_Met	Met	Met	High_Met	High_Met	High_Met	High_Met	High_Met	High_Met	High_Met	High_Met	High_Met	145	31	0.213793
High_Met	Unmet	Unmet	Unmet	Unmet	Unmet	Unmet	Unmet	Met	Unmet	Unmet	Unmet	Unmet	235	50	0.212766
High_Met	High_Met	Met	Met	Met	Met	Met	Met	Met	Unmet	Met	Met	Met	47	10	0.212766
High_Met	Met	Met	Met	Met	Met	Unmet	Unmet	Unmet	Unmet	Met	Unmet	Unmet	80	17	0.2125
High_Met	Met	Met	Unmet	Unmet	Met	Unmet	Unmet	Unmet	Unmet	Unmet	Unmet	Unmet	802	170	0.21197
High_Met	High_Met	Met	Met	Met	Met	Met	Met	Unmet	Met	Unmet	Met	Unmet	118	25	0.211864
High_Met	High_Met	High_Met	High_Met	Met	Unmet	Unmet	Unmet	Unmet	Unmet	Unmet	Unmet	Met	109	23	0.211009
High_Met	High_Met	Met	High_Met	Met	Met	Met	Unmet	Unmet	Unmet	Unmet	Met	Unmet	109	23	0.211009
High_Met	High_Met	High_Met	Met	Met	Unmet	Unmet	Unmet	Unmet	Met	Unmet	Unmet	Unmet	489	103	0.210634
High_Met	High_Met	High_Met	Met	Met	Unmet	Met	Unmet	Unmet	Unmet	Unmet	Met	Unmet	114	24	0.210526
High_Met	High_Met	Met	High_Met	Met	Met	Unmet	Met	Unmet	Unmet	Unmet	Unmet	Unmet	95	20	0.210526
High_Met	High_Met	Met	High_Met	Met	Met	Met	Unmet	Unmet	Met	Unmet	Met	Unmet	57	12	0.210526
High_Met	High_Met	Met	Met	Met	Met	Unmet	Unmet	Met	Unmet	Unmet	Met	Unmet	76	16	0.210526
High_Met	Met	Unmet	Unmet	Met	Unmet	Unmet	Unmet	Unmet	Met	Unmet	Unmet	Unmet	76	16	0.210526
High_Met	High_Met	High_Met	Met	Unmet	Unmet	Met	Unmet	Unmet	Unmet	Unmet	Unmet	Unmet	157	33	0.210191
High_Met	Unmet	Unmet	Unmet	Unmet	Met	Unmet	Unmet	Unmet	Met	Unmet	Unmet	Unmet	276	58	0.210145
High_Met	High_Met	Unmet	Unmet	Met	Met	Unmet	Unmet	Unmet	Unmet	Unmet	Unmet	Unmet	196	41	0.209184
High_Met	High_Met	Met	Met	Met	Met	Met	Unmet	Met	Met	Met	Met	Unmet	110	23	0.209091
High_Met	Unmet	High_Met	Unmet	Unmet	Unmet	Unmet	Unmet	Unmet	Unmet	Unmet	Unmet	Unmet	72	15	0.208333
High_Met	High_Met	Met	High_Met	Met	Met	Met	Met	Met	Met	Met	Met	Met	216	45	0.208333
High_Met	Met	High_Met	High_Met	Unmet	Unmet	Unmet	Unmet	Unmet	Unmet	Unmet	Unmet	Unmet	48	10	0.208333
High_Met	High_Met	Met	High_Met	High_Met	Met	Unmet	Unmet	Unmet	Unmet	Unmet	Unmet	Unmet	370	77	0.208108
High_Met	High_Met	Unmet	Met	Met	Unmet	Unmet	Unmet	Unmet	Met	Unmet	Unmet	Unmet	154	32	0.207792
High_Met	High_Met	High_Met	High_Met	High_Met	High_Met	High_Met	High_Met	High_Met	Met	High_Met	High_Met	High_Met	53	11	0.207547
High_Met	High_Met	High_Met	Met	Met	Met	Met	Met	Unmet	Unmet	Unmet	Unmet	Unmet	53	11	0.207547
High_Met	Unmet	Met	Met	Unmet	Unmet	Unmet	Met	Unmet	Unmet	Unmet	Unmet	Unmet	58	12	0.206897
High_Met	High_Met	High_Met	Met	Met	Met	Unmet	Unmet	Unmet	Met	Unmet	Met	Unmet	150	31	0.206667
High_Met	High_Met	Met	Met	Unmet	Unmet	Unmet	Unmet	Unmet	Unmet	Unmet	Unmet	Met	213	44	0.206573
High_Met	Met	Met	Met	Met	Met	Met	Unmet	Unmet	Unmet	Unmet	Unmet	Unmet	310	64	0.206452
High_Met	Met	Met	Met	Unmet	Unmet	Unmet	Unmet	Unmet	Unmet	Unmet	Met	Unmet	272	56	0.205882
High_Met	High_Met	High_Met	High_Met	High_Met	Met	Met	Met	Met	Met	Met	Met	Met	141	29	0.205674
High_Met	High_Met	High_Met	Met	Met	Met	Unmet	Unmet	Met	Met	Unmet	Unmet	Unmet	49	10	0.204082
High_Met	Met	Unmet	Met	Unmet	Met	Unmet	Unmet	Unmet	Unmet	Unmet	Met	Unmet	98	20	0.204082
High_Met	High_Met	High_Met	Met	Met	Met	Met	Unmet	Unmet	Unmet	Unmet	Met	Unmet	167	34	0.203593
High_Met	High_Met	High_Met	Met	Met	Unmet	Met	Unmet	Unmet	Unmet	Unmet	Unmet	Unmet	1101	224	0.203451
High_Met	Unmet	Met	Met	Unmet	Unmet	Unmet	Unmet	Unmet	Met	Unmet	Unmet	Unmet	118	24	0.20339
High_Met	Met	Unmet	Met	Met	Unmet	Met	Unmet	Unmet	Unmet	Unmet	Unmet	Unmet	128	26	0.203125
High_Met	Met	High_Met	Unmet	Met	Unmet	Unmet	Unmet	Unmet	Unmet	Unmet	Unmet	Unmet	133	27	0.203008
High_Met	High_Met	Met	Met	Met	Unmet	Unmet	Met	Unmet	Unmet	Unmet	Unmet	Unmet	670	136	0.202985
High_Met	Unmet	Met	Unmet	Unmet	Unmet	Unmet	Unmet	Unmet	Met	Unmet	Unmet	Unmet	276	56	0.202899
High_Met	High_Met	High_Met	High_Met	Unmet	Unmet	Unmet	Unmet	Unmet	Unmet	Unmet	Unmet	Unmet	419	85	0.202864
High_Met	Unmet	Unmet	Met	Met	Unmet	Unmet	Unmet	Unmet	Unmet	Unmet	Met	Unmet	143	29	0.202797
High_Met	Unmet	Unmet	Unmet	Unmet	Unmet	Unmet	Met	Unmet	Unmet	Unmet	Unmet	Unmet	439	89	0.202733
High_Met	Unmet	High_Met	Met	Unmet	Unmet	Unmet	Unmet	Unmet	Unmet	Unmet	Unmet	Unmet	74	15	0.202703
High_Met	Met	Met	High_Met	Met	Met	Unmet	Unmet	Unmet	Unmet	Unmet	Unmet	Unmet	222	45	0.202703
High_Met	High_Met	Met	Met	High_Met	Unmet	Unmet	Unmet	Unmet	Unmet	Unmet	Unmet	Unmet	1667	337	0.20216
High_Met	High_Met	Unmet	Unmet	Unmet	Met	Unmet	Unmet	Unmet	Unmet	Unmet	Unmet	Unmet	274	55	0.20073
High_Met	High_Met	High_Met	High_Met	Unmet	Met	Unmet	Unmet	Unmet	Unmet	Unmet	Unmet	Unmet	90	18	0.2
High_Met	High_Met	High_Met	High_Met	Met	Met	Unmet	Unmet	Unmet	Met	Unmet	Unmet	Unmet	185	37	0.2
High_Met	High_Met	Unmet	Met	Met	Met	Unmet	Unmet	Unmet	Met	Unmet	Unmet	Unmet	60	12	0.2
High_Met	High_Met	Met	High_Met	Met	Met	Unmet	Unmet	Unmet	Unmet	Unmet	Unmet	Met	80	16	0.2
High_Met	Unmet	Met	Met	Met	Unmet	Unmet	Unmet	Unmet	Unmet	Unmet	Met	Unmet	170	34	0.2
High_Met	High_Met	Met	Met	Met	Unmet	Met	Unmet	Met	Unmet	Unmet	Unmet	Unmet	60	12	0.2
High_Met	Met	Unmet	Met	Met	Met	Met	Unmet	Unmet	Unmet	Unmet	Unmet	Unmet	100	20	0.2
High_Met	High_Met	Met	Met	Unmet	Met	Unmet	Unmet	Unmet	Unmet	Unmet	Unmet	Unmet	1614	322	0.199504
High_Met	High_Met	High_Met	Met	Met	Met	Met	Unmet	Unmet	Unmet	Unmet	Unmet	Unmet	608	121	0.199013
High_Met	High_Met	Met	Unmet	Met	Met	Unmet	Unmet	Unmet	Unmet	Unmet	Unmet	Unmet	598	119	0.198997
High_Met	Unmet	Met	Met	Met	Unmet	Met	Unmet	Unmet	Unmet	Unmet	Unmet	Unmet	181	36	0.198895
High_Met	Met	Unmet	Unmet	Unmet	Met	Unmet	Unmet	Unmet	Met	Unmet	Unmet	Unmet	151	30	0.198675
High_Met	Met	High_Met	High_Met	Met	Unmet	Unmet	Unmet	Unmet	Unmet	Unmet	Unmet	Unmet	389	77	0.197943
High_Met	Met	Unmet	Unmet	Met	Met	Met	Unmet	Unmet	Unmet	Unmet	Unmet	Unmet	91	18	0.197802
High_Met	High_Met	Met	Met	Met	Unmet	Unmet	Unmet	Unmet	Unmet	Met	Met	Unmet	86	17	0.197674
High_Met	Unmet	Met	Met	Unmet	Met	Unmet	Unmet	Unmet	Unmet	Unmet	Unmet	Unmet	912	180	0.197368
High_Met	High_Met	Met	Met	Unmet	Unmet	Unmet	Unmet	Unmet	Unmet	Met	Unmet	Unmet	198	39	0.19697
High_Met	Met	Met	Met	Met	Met	Met	Met	Met	Met	Met	Met	Met	310	61	0.196774
High_Met	Unmet	Unmet	Unmet	Met	Met	Unmet	Unmet	Unmet	Unmet	Unmet	Unmet	Unmet	1048	206	0.196565
High_Met	High_Met	Met	High_Met	Met	Met	Met	Unmet	Met	Met	Met	Met	Met	56	11	0.196429
High_Met	High_Met	Met	Met	Met	Met	Met	Met	Met	Met	Met	Unmet	Met	56	11	0.196429
High_Met	Met	Unmet	Unmet	Unmet	Met	Unmet	Unmet	Unmet	Unmet	Met	Unmet	Unmet	56	11	0.196429
High_Met	Met	Met	High_Met	Met	Unmet	Met	Unmet	Unmet	Unmet	Unmet	Unmet	Unmet	56	11	0.196429
High_Met	Met	Met	Unmet	Met	Unmet	Unmet	Unmet	Unmet	Unmet	Unmet	Unmet	Unmet	1896	372	0.196203
High_Met	High_Met	High_Met	Met	Met	Met	Met	Met	Met	Met	Met	High_Met	Met	51	10	0.196078
High_Met	Met	Met	Unmet	Met	Unmet	Unmet	Unmet	Unmet	Met	Unmet	Unmet	Unmet	51	10	0.196078
High_Met	Unmet	Unmet	Met	Met	Unmet	Unmet	Unmet	Unmet	Met	Unmet	Unmet	Unmet	92	18	0.195652
High_Met	Unmet	Unmet	Unmet	Met	Met	Unmet	Unmet	Unmet	Unmet	Unmet	Met	Unmet	133	26	0.195489
High_Met	High_Met	Met	High_Met	Met	Met	Unmet	Unmet	Unmet	Unmet	Unmet	Met	Unmet	333	65	0.195195
High_Met	High_Met	High_Met	Met	Unmet	Unmet	Unmet	Unmet	Unmet	Unmet	Unmet	Unmet	Unmet	2834	553	0.195131
High_Met	High_Met	Met	Met	Met	High_Met	Met	Met	Met	Met	Met	Met	Met	123	24	0.195122
High_Met	High_Met	High_Met	Met	Met	Unmet	Unmet	Unmet	Unmet	Unmet	Unmet	Unmet	Unmet	15386	3000	0.194982
High_Met	Unmet	Unmet	Unmet	Met	Unmet	Unmet	Unmet	Unmet	Met	Unmet	Unmet	Unmet	154	30	0.194805
High_Met	Unmet	Met	Met	Unmet	Met	Met	Unmet	Unmet	Unmet	Unmet	Unmet	Unmet	149	29	0.194631
High_Met	Unmet	Unmet	Met	Unmet	Met	Unmet	Unmet	Unmet	Unmet	Unmet	Unmet	Unmet	1470	286	0.194558
High_Met	Unmet	High_Met	Met	Met	Unmet	Unmet	Unmet	Unmet	Unmet	Unmet	Unmet	Unmet	144	28	0.194444
High_Met	High_Met	Met	Unmet	High_Met	Unmet	Unmet	Unmet	Unmet	Unmet	Unmet	Unmet	Unmet	72	14	0.194444
Met	Unmet	Unmet	Unmet	Unmet	Met	Unmet	Unmet	Unmet	Unmet	Unmet	Met	Unmet	72	14	0.194444
High_Met	High_Met	Met	Met	Met	Met	Unmet	Met	Unmet	Unmet	Unmet	Unmet	Unmet	340	66	0.194118
High_Met	High_Met	High_Met	Met	High_Met	Met	Met	Met	Met	Met	Met	Met	Met	67	13	0.19403
High_Met	Unmet	Met	Unmet	Met	Met	Unmet	Unmet	Unmet	Unmet	Unmet	Met	Unmet	98	19	0.193878
High_Met	Met	Unmet	Unmet	Unmet	Unmet	Unmet	Unmet	Unmet	Unmet	Unmet	Unmet	Met	196	38	0.193878
High_Met	High_Met	High_Met	Met	Met	Unmet	Unmet	Unmet	Unmet	Unmet	Unmet	Met	Unmet	1017	197	0.193707
High_Met	Unmet	Unmet	Met	Unmet	Unmet	Unmet	Unmet	Met	Unmet	Unmet	Unmet	Unmet	62	12	0.193548
High_Met	Met	Unmet	Met	Met	Met	Unmet	Unmet	Unmet	Unmet	Unmet	Met	Unmet	62	12	0.193548
High_Met	Unmet	Met	Unmet	Met	Unmet	Unmet	Unmet	Unmet	Unmet	Unmet	Unmet	Unmet	2408	466	0.193522
High_Met	Met	Met	Unmet	Unmet	Unmet	Unmet	Unmet	Unmet	Unmet	Unmet	Met	Unmet	243	47	0.193416
High_Met	Unmet	Unmet	Met	Unmet	Unmet	Unmet	Unmet	Unmet	Unmet	Met	Unmet	Unmet	145	28	0.193103
High_Met	High_Met	Met	Met	Unmet	Met	Unmet	Met	Unmet	Unmet	Unmet	Unmet	Unmet	57	11	0.192982
High_Met	High_Met	Met	Met	Met	Unmet	Unmet	Met	Unmet	Unmet	Unmet	Met	Unmet	57	11	0.192982
High_Met	Met	Met	Unmet	Met	Met	Met	Unmet	Unmet	Unmet	Unmet	Unmet	Unmet	83	16	0.192771
High_Met	High_Met	High_Met	Met	High_Met	Met	Unmet	Unmet	Unmet	Unmet	Unmet	Unmet	Unmet	436	84	0.192661
High_Met	High_Met	Met	Met	Met	Unmet	Unmet	Unmet	Unmet	Unmet	Met	Unmet	Unmet	815	157	0.192638
High_Met	High_Met	Met	Met	Met	Met	Unmet	Unmet	Unmet	Met	Unmet	Met	Unmet	270	52	0.192593
High_Met	High_Met	High_Met	Met	Met	Unmet	Unmet	Unmet	Unmet	Unmet	Met	Unmet	Unmet	317	61	0.192429
High_Met	High_Met	High_Met	High_Met	Met	Met	Met	Met	Met	Met	Unmet	Met	Unmet	52	10	0.192308
High_Met	High_Met	Met	Met	Unmet	Met	Met	Unmet	Unmet	Unmet	Unmet	Unmet	Unmet	208	40	0.192308
High_Met	High_Met	Met	Met	Met	Met	Unmet	Unmet	Met	Unmet	Unmet	Unmet	Unmet	276	53	0.192029
High_Met	High_Met	Met	Met	Met	Met	Unmet	Unmet	Unmet	Unmet	Met	Unmet	Unmet	417	80	0.191847
High_Met	Unmet	Unmet	Met	Met	Unmet	Unmet	Unmet	Unmet	Unmet	Unmet	Unmet	Unmet	2471	474	0.191825
High_Met	Unmet	Unmet	Unmet	Unmet	Met	Unmet	Unmet	Unmet	Unmet	Unmet	Unmet	Unmet	4583	879	0.191796
High_Met	Met	Unmet	Met	Unmet	Unmet	Met	Unmet	Unmet	Unmet	Unmet	Unmet	Unmet	266	51	0.191729
High_Met	High_Met	Met	Met	Met	Unmet	Unmet	Unmet	Unmet	Unmet	Unmet	Met	Unmet	2668	511	0.191529
High_Met	High_Met	Unmet	High_Met	Unmet	Unmet	Unmet	Unmet	Unmet	Unmet	Unmet	Unmet	Unmet	141	27	0.191489
High_Met	Unmet	Unmet	Unmet	Met	Unmet	Unmet	Unmet	Unmet	Unmet	Unmet	Unmet	Met	94	18	0.191489
High_Met	High_Met	Unmet	Met	High_Met	Unmet	Unmet	Unmet	Unmet	Unmet	Unmet	Unmet	Unmet	115	22	0.191304
High_Met	Unmet	Unmet	Met	Unmet	Unmet	Unmet	Unmet	Unmet	Unmet	Unmet	Unmet	Unmet	8910	1702	0.191021
High_Met	Unmet	Unmet	Unmet	Met	Unmet	Unmet	Unmet	Unmet	Unmet	Unmet	Met	Unmet	309	59	0.190939
High_Met	High_Met	Met	High_Met	Met	Unmet	Unmet	Unmet	Met	Unmet	Unmet	Unmet	Unmet	110	21	0.190909
High_Met	Unmet	Met	Met	Met	Met	Unmet	Unmet	Unmet	Unmet	Unmet	Unmet	Unmet	723	138	0.190871
High_Met	Unmet	Unmet	Unmet	Unmet	Met	Unmet	Unmet	Unmet	Unmet	Unmet	Unmet	Met	131	25	0.19084
High_Met	Met	Met	Unmet	Met	Met	Unmet	Unmet	Unmet	Unmet	Unmet	Unmet	Unmet	414	79	0.190821
High_Met	High_Met	Met	Met	Met	Met	Unmet	Unmet	Unmet	Met	Unmet	Unmet	Unmet	761	145	0.190539
High_Met	Met	Met	Met	Met	Met	Unmet	Unmet	Unmet	Unmet	Unmet	Unmet	Unmet	1732	330	0.190531
High_Met	High_Met	Met	High_Met	High_Met	Unmet	Met	Unmet	Unmet	Unmet	Unmet	Unmet	Unmet	63	12	0.190476
High_Met	Met	High_Met	Met	Met	Met	Met	Unmet	Unmet	Unmet	Unmet	Unmet	Unmet	63	12	0.190476
High_Met	Met	Met	Unmet	Met	Unmet	Unmet	Unmet	Unmet	Unmet	Unmet	Met	Unmet	126	24	0.190476
High_Met	Met	Met	Met	Met	Met	Met	Met	Met	Met	Unmet	Met	Met	63	12	0.190476
High_Met	High_Met	Met	Met	Met	Unmet	Unmet	Unmet	Unmet	Unmet	Unmet	Unmet	Met	772	147	0.190415
High_Met	High_Met	High_Met	Met	High_Met	Unmet	Unmet	Unmet	Unmet	Unmet	Unmet	Unmet	Unmet	930	177	0.190323
High_Met	Met	Unmet	Met	Unmet	Unmet	Unmet	Unmet	Unmet	Unmet	Unmet	Unmet	Unmet	4377	833	0.190313
High_Met	High_Met	Met	Met	Unmet	Met	Unmet	Unmet	Unmet	Unmet	Unmet	Met	Unmet	184	35	0.190217
High_Met	Unmet	Unmet	Unmet	Unmet	Met	Met	Unmet	Unmet	Unmet	Unmet	Met	Unmet	121	23	0.190083
High_Met	High_Met	High_Met	High_Met	Met	Unmet	Unmet	Unmet	Met	Unmet	Unmet	Unmet	Unmet	79	15	0.189873
High_Met	Unmet	Unmet	Unmet	Met	Met	Met	Unmet	Unmet	Unmet	Unmet	Unmet	Unmet	158	30	0.189873
High_Met	Met	Unmet	Unmet	Unmet	Unmet	Unmet	Unmet	Unmet	Met	Unmet	Unmet	Unmet	295	56	0.189831
High_Met	High_Met	High_Met	Met	Met	Met	Unmet	Unmet	Unmet	Unmet	Unmet	Unmet	Unmet	3674	697	0.189711
High_Met	High_Met	Met	Met	Met	Met	Unmet	Unmet	Unmet	Unmet	Unmet	Unmet	Unmet	8973	1700	0.189457
High_Met	Met	Met	Unmet	Unmet	Unmet	Unmet	Unmet	Unmet	Unmet	Unmet	Unmet	Unmet	4990	944	0.189178
High_Met	High_Met	High_Met	High_Met	Met	Unmet	Met	Unmet	Unmet	Unmet	Unmet	Unmet	Unmet	418	79	0.188995
High_Met	Unmet	Met	Met	Unmet	Unmet	Unmet	Unmet	Unmet	Unmet	Unmet	Unmet	Unmet	4171	788	0.188924
High_Met	High_Met	Met	Met	Met	Met	Unmet	Unmet	Unmet	Unmet	Met	Met	Unmet	90	17	0.188889
High_Met	High_Met	Met	High_Met	Met	Unmet	Unmet	Unmet	Unmet	Unmet	Unmet	Met	Unmet	567	107	0.188713
High_Met	Unmet	Met	Unmet	Unmet	Met	Unmet	Unmet	Unmet	Unmet	Unmet	Unmet	Unmet	1580	298	0.188608
High_Met	High_Met	Met	Met	Met	Unmet	Met	Unmet	Unmet	Met	Unmet	Unmet	Unmet	175	33	0.188571
High_Met	Unmet	Met	Unmet	Unmet	Unmet	Met	Unmet	Unmet	Unmet	Unmet	Unmet	Unmet	537	101	0.188082
High_Met	High_Met	Unmet	High_Met	Met	Unmet	Unmet	Unmet	Unmet	Unmet	Unmet	Unmet	Unmet	649	122	0.187982
High_Met	High_Met	Met	Met	Met	Unmet	Unmet	Unmet	Unmet	Unmet	Unmet	Unmet	Unmet	46148	8669	0.187852
High_Met	Met	Met	High_Met	Unmet	Unmet	Unmet	Unmet	Unmet	Unmet	Unmet	Unmet	Unmet	176	33	0.1875
High_Met	High_Met	Met	Unmet	Met	Unmet	Unmet	Unmet	Unmet	Unmet	Unmet	Unmet	Unmet	3963	741	0.18698
High_Met	High_Met	Met	High_Met	Met	Unmet	Unmet	Unmet	Unmet	Unmet	Unmet	Unmet	Unmet	8406	1571	0.18689
High_Met	High_Met	Met	Met	Met	Met	Met	Met	Unmet	Met	Met	Met	Met	91	17	0.186813
High_Met	Met	Met	Met	Met	Met	Met	Met	Met	Met	Met	Met	Unmet	75	14	0.186667
High_Met	Met	Met	Met	Met	Unmet	Unmet	Unmet	Unmet	Unmet	Unmet	Unmet	Unmet	7559	1410	0.186533
High_Met	High_Met	Met	Met	Met	Unmet	Unmet	Unmet	Unmet	Met	Unmet	Met	Unmet	167	31	0.185629
High_Met	High_Met	Unmet	Met	Met	Unmet	Met	Unmet	Unmet	Unmet	Unmet	Unmet	Unmet	318	59	0.185535
High_Met	Met	Met	Met	Met	Unmet	Unmet	Met	Unmet	Unmet	Unmet	Unmet	Unmet	124	23	0.185484
High_Met	High_Met	Met	High_Met	Met	Unmet	Unmet	Met	Unmet	Unmet	Unmet	Unmet	Unmet	151	28	0.18543
High_Met	Unmet	Met	Met	Met	Met	Met	Unmet	Unmet	Unmet	Unmet	Unmet	Unmet	151	28	0.18543
High_Met	High_Met	Unmet	Unmet	Unmet	Unmet	Unmet	Unmet	Unmet	Unmet	Unmet	Unmet	Unmet	2957	548	0.185323
High_Met	High_Met	Unmet	Unmet	Unmet	Unmet	Unmet	Unmet	Unmet	Unmet	Unmet	Met	Unmet	135	25	0.185185
High_Met	Unmet	Met	Unmet	Met	Unmet	Unmet	Unmet	Unmet	Unmet	Unmet	Met	Unmet	135	25	0.185185
High_Met	High_Met	Met	High_Met	Met	Unmet	Met	Unmet	Unmet	Unmet	Unmet	Unmet	Unmet	594	110	0.185185
High_Met	High_Met	Met	Met	Unmet	Met	Unmet	Unmet	Unmet	Unmet	Met	Unmet	Unmet	54	10	0.185185
High_Met	Met	Met	Unmet	Met	Unmet	Met	Unmet	Unmet	Unmet	Unmet	Unmet	Unmet	135	25	0.185185
High_Met	Met	Met	Met	Met	Met	Met	Met	Unmet	Met	Unmet	Met	Unmet	54	10	0.185185
High_Met	High_Met	Met	Met	Met	Met	Unmet	Unmet	Unmet	Unmet	Unmet	Unmet	Met	281	52	0.185053
High_Met	High_Met	High_Met	High_Met	Met	Unmet	Unmet	Unmet	Unmet	Unmet	Unmet	Unmet	Unmet	4608	852	0.184896
High_Met	Met	Unmet	Met	Met	Unmet	Unmet	Unmet	Unmet	Unmet	Unmet	Met	Unmet	157	29	0.184713
High_Met	Met	Unmet	Unmet	Unmet	Met	Unmet	Unmet	Unmet	Unmet	Unmet	Unmet	Unmet	1668	308	0.184652
High_Met	Unmet	Unmet	Met	Unmet	Unmet	Unmet	Met	Unmet	Unmet	Unmet	Unmet	Unmet	130	24	0.184615
High_Met	Met	Met	Met	Unmet	Met	Unmet	Unmet	Unmet	Unmet	Unmet	Unmet	Unmet	824	152	0.184466
High_Met	Unmet	Unmet	Met	Met	Met	Unmet	Unmet	Unmet	Unmet	Unmet	Unmet	Unmet	651	120	0.184332
High_Met	High_Met	Unmet	Met	Unmet	Unmet	Met	Unmet	Unmet	Unmet	Unmet	Unmet	Unmet	196	36	0.183673
High_Met	High_Met	Met	Met	Unmet	Unmet	Unmet	Unmet	Unmet	Unmet	Unmet	Met	Unmet	692	127	0.183526
High_Met	High_Met	High_Met	Met	Met	High_Met	High_Met	Met	High_Met	High_Met	High_Met	High_Met	High_Met	60	11	0.183333
High_Met	Met	Met	Unmet	Unmet	Unmet	Unmet	Met	Unmet	Unmet	Unmet	Unmet	Unmet	60	11	0.183333
High_Met	Unmet	Met	Unmet	Unmet	Unmet	Unmet	Unmet	Unmet	Unmet	Unmet	Unmet	Unmet	10911	1997	0.183026
High_Met	High_Met	Met	Met	High_Met	Met	Unmet	Unmet	Unmet	Met	Unmet	Unmet	Unmet	82	15	0.182927
High_Met	Met	Unmet	Unmet	Met	Unmet	Unmet	Unmet	Unmet	Unmet	Unmet	Unmet	Unmet	2371	433	0.182623
High_Met	High_Met	High_Met	Met	Met	Met	Unmet	Unmet	Unmet	Met	Unmet	Unmet	Unmet	367	67	0.182561
High_Met	High_Met	Unmet	Met	Unmet	Met	Unmet	Unmet	Unmet	Unmet	Unmet	Unmet	Unmet	433	79	0.182448
High_Met	Unmet	Unmet	Met	Unmet	Unmet	Met	Unmet	Unmet	Unmet	Unmet	Unmet	Unmet	516	94	0.182171
High_Met	High_Met	Met	Met	Met	Unmet	Met	Unmet	Unmet	Unmet	Unmet	Unmet	Unmet	2883	525	0.182102
High_Met	High_Met	Met	Met	Met	Unmet	Unmet	Unmet	Unmet	Met	Unmet	Unmet	Unmet	1270	231	0.18189
High_Met	High_Met	Met	Met	Met	Met	Met	Unmet	Unmet	Unmet	Unmet	Unmet	Unmet	1325	241	0.181887
High_Met	High_Met	Unmet	Unmet	Met	Unmet	Met	Unmet	Unmet	Unmet	Unmet	Unmet	Unmet	66	12	0.181818
High_Met	High_Met	High_Met	High_Met	Met	Met	Met	Unmet	Unmet	Unmet	Unmet	Met	Unmet	88	16	0.181818
High_Met	High_Met	High_Met	Met	Met	Met	Met	Unmet	Met	Met	Unmet	Met	Unmet	55	10	0.181818
High_Met	High_Met	Met	Unmet	Met	Unmet	Unmet	Met	Unmet	Unmet	Unmet	Unmet	Unmet	55	10	0.181818
High_Met	High_Met	Unmet	Met	Met	Unmet	Unmet	Unmet	Unmet	Unmet	Unmet	Unmet	Unmet	5892	1071	0.181772
High_Met	Met	Unmet	Unmet	Unmet	Unmet	Unmet	Unmet	Unmet	Unmet	Unmet	Unmet	Unmet	12261	2228	0.181714
High_Met	Met	Met	Met	Unmet	Unmet	Unmet	Unmet	Unmet	Unmet	Unmet	Unmet	Unmet	4859	880	0.181107
High_Met	Unmet	Met	Met	Met	Unmet	Unmet	Unmet	Unmet	Unmet	Unmet	Unmet	Unmet	2365	428	0.180973
High_Met	Unmet	Unmet	Unmet	Unmet	Unmet	Unmet	Unmet	Unmet	Unmet	Unmet	Unmet	Unmet	41500	7502	0.180771
High_Met	High_Met	Unmet	Unmet	Met	Unmet	Unmet	Unmet	Unmet	Unmet	Unmet	Unmet	Unmet	1334	241	0.18066
High_Met	High_Met	Met	High_Met	Unmet	Unmet	Unmet	Unmet	Unmet	Unmet	Unmet	Unmet	Unmet	1290	233	0.18062
High_Met	Unmet	Unmet	Unmet	Unmet	Unmet	Met	Unmet	Unmet	Met	Unmet	Unmet	Unmet	72	13	0.180556
High_Met	Unmet	Met	Unmet	Unmet	Unmet	Unmet	Unmet	Unmet	Unmet	Unmet	Met	Unmet	504	91	0.180556
High_Met	High_Met	Met	Met	Met	Met	Met	Unmet	Unmet	Unmet	Unmet	Met	Unmet	322	58	0.180124
High_Met	High_Met	High_Met	High_Met	Met	Met	Unmet	Unmet	Unmet	Unmet	Unmet	Met	Unmet	261	47	0.180077
High_Met	High_Met	Met	Met	Unmet	Unmet	Unmet	Unmet	Unmet	Unmet	Unmet	Unmet	Unmet	14070	2533	0.180028
High_Met	High_Met	High_Met	Met	Met	Unmet	Met	Unmet	Unmet	Met	Unmet	Unmet	Unmet	100	18	0.18
High_Met	High_Met	Met	High_Met	Met	Met	Unmet	Unmet	Unmet	Unmet	Unmet	Unmet	Unmet	2251	405	0.17992
High_Met	High_Met	High_Met	High_Met	Met	Unmet	Unmet	Unmet	Unmet	Unmet	Met	Unmet	Unmet	128	23	0.179688
High_Met	High_Met	Met	High_Met	Unmet	Unmet	Met	Unmet	Unmet	Unmet	Unmet	Unmet	Unmet	78	14	0.179487
High_Met	Met	Unmet	Unmet	Unmet	Met	Unmet	Met	Unmet	Unmet	Unmet	Unmet	Unmet	67	12	0.179104
High_Met	High_Met	High_Met	Met	High_Met	Met	Unmet	Unmet	Unmet	Met	Unmet	Unmet	Unmet	56	10	0.178571
High_Met	Unmet	Met	Unmet	Unmet	Met	Unmet	Met	Unmet	Unmet	Unmet	Unmet	Unmet	56	10	0.178571
High_Met	High_Met	Met	Unmet	Met	Unmet	Unmet	Unmet	Unmet	Unmet	Met	Unmet	Unmet	56	10	0.178571
Met	High_Met	Met	High_Met	Met	Unmet	Unmet	Unmet	Unmet	Unmet	Unmet	Unmet	Unmet	168	30	0.178571
High_Met	High_Met	Met	Unmet	Unmet	Unmet	Unmet	Unmet	Unmet	Unmet	Unmet	Unmet	Unmet	3586	639	0.178193
High_Met	High_Met	Unmet	Met	Unmet	Unmet	Unmet	Unmet	Unmet	Met	Unmet	Unmet	Unmet	73	13	0.178082
High_Met	Met	Unmet	Unmet	Unmet	Met	Unmet	Unmet	Unmet	Unmet	Unmet	Met	Unmet	191	34	0.17801
High_Met	High_Met	High_Met	High_Met	Met	Met	Unmet	Unmet	Unmet	Unmet	Unmet	Unmet	Unmet	1609	286	0.17775
High_Met	Met	High_Met	Met	Met	Unmet	Unmet	Unmet	Unmet	Unmet	Unmet	Unmet	Unmet	1626	289	0.177737
High_Met	High_Met	Met	Unmet	Met	Unmet	Met	Unmet	Unmet	Unmet	Unmet	Unmet	Unmet	197	35	0.177665
High_Met	Met	Unmet	Met	Unmet	Met	Unmet	Unmet	Unmet	Unmet	Unmet	Unmet	Unmet	788	140	0.177665
High_Met	Met	Unmet	Met	Met	Unmet	Unmet	Unmet	Unmet	Unmet	Unmet	Unmet	Unmet	2265	402	0.177483
High_Met	High_Met	Met	High_Met	Met	Unmet	Met	Unmet	Unmet	Unmet	Unmet	Met	Unmet	62	11	0.177419
High_Met	Unmet	Unmet	Unmet	Unmet	Met	Met	Unmet	Unmet	Unmet	Unmet	Unmet	Unmet	581	103	0.177281
High_Met	Unmet	Unmet	Unmet	Met	Unmet	Unmet	Unmet	Unmet	Unmet	Unmet	Unmet	Unmet	5654	1002	0.17722
High_Met	High_Met	Met	Met	High_Met	Met	Unmet	Unmet	Unmet	Unmet	Unmet	Unmet	Unmet	593	105	0.177066
High_Met	High_Met	Met	Met	Met	Met	Unmet	Unmet	Unmet	Unmet	Unmet	Met	Unmet	1051	186	0.176974
High_Met	Met	Unmet	Unmet	Unmet	Unmet	Unmet	Unmet	Unmet	Unmet	Unmet	Met	Unmet	616	109	0.176948
High_Met	Met	Met	Unmet	Unmet	Met	Met	Unmet	Unmet	Unmet	Unmet	Unmet	Unmet	130	23	0.176923
High_Met	Unmet	Unmet	Unmet	Unmet	Unmet	Unmet	Unmet	Unmet	Unmet	Unmet	Met	Unmet	1743	308	0.176707
High_Met	High_Met	High_Met	High_Met	Met	Met	Unmet	Unmet	Unmet	Unmet	Met	Unmet	Unmet	102	18	0.176471
High_Met	High_Met	Met	Met	Unmet	Unmet	Unmet	Met	Unmet	Unmet	Unmet	Unmet	Unmet	170	30	0.176471
High_Met	High_Met	Met	Met	Met	Unmet	Met	Met	Unmet	Unmet	Unmet	Unmet	Unmet	85	15	0.176471
High_Met	High_Met	Met	Unmet	Unmet	Unmet	Unmet	Unmet	Unmet	Unmet	Unmet	Met	Unmet	176	31	0.176136
High_Met	High_Met	Met	Met	Met	Met	Met	Met	Met	Met	Unmet	Met	Unmet	108	19	0.175926
High_Met	High_Met	Unmet	Met	Unmet	Unmet	Unmet	Unmet	Unmet	Unmet	Unmet	Unmet	Unmet	3835	672	0.175228
High_Met	Met	Unmet	Unmet	Met	Met	Unmet	Unmet	Unmet	Unmet	Unmet	Unmet	Unmet	469	82	0.17484
High_Met	High_Met	High_Met	Unmet	Met	Unmet	Unmet	Unmet	Unmet	Unmet	Unmet	Unmet	Unmet	738	129	0.174797
High_Met	Unmet	Met	Unmet	Met	Met	Unmet	Unmet	Unmet	Unmet	Unmet	Unmet	Unmet	539	94	0.174397
High_Met	Met	Met	Met	Met	Unmet	Met	Unmet	Unmet	Unmet	Unmet	Unmet	Unmet	482	84	0.174274
High_Met	Met	Met	High_Met	Met	Unmet	Unmet	Unmet	Unmet	Unmet	Unmet	Unmet	Unmet	844	147	0.174171
High_Met	Unmet	Unmet	Met	Unmet	Unmet	Unmet	Unmet	Unmet	Unmet	Unmet	Met	Unmet	471	82	0.174098
High_Met	Unmet	Unmet	Unmet	Met	Met	Unmet	Unmet	Unmet	Met	Unmet	Unmet	Unmet	92	16	0.173913
High_Met	Met	Unmet	Unmet	Met	Unmet	Met	Unmet	Unmet	Unmet	Unmet	Unmet	Unmet	138	24	0.173913
High_Met	Unmet	Met	Unmet	Met	Unmet	Met	Unmet	Unmet	Unmet	Unmet	Unmet	Unmet	156	27	0.173077
High_Met	High_Met	Met	Unmet	Unmet	Met	Unmet	Unmet	Unmet	Unmet	Unmet	Unmet	Unmet	370	64	0.172973
High_Met	High_Met	High_Met	Met	High_Met	Met	Met	Unmet	Unmet	Unmet	Unmet	Unmet	Unmet	87	15	0.172414
High_Met	Unmet	Met	Met	Unmet	Unmet	Unmet	Unmet	Unmet	Unmet	Unmet	Met	Unmet	238	41	0.172269
High_Met	Unmet	Met	Met	Unmet	Unmet	Unmet	Unmet	Unmet	Unmet	Met	Unmet	Unmet	93	16	0.172043
High_Met	Unmet	Met	Met	Met	Unmet	Unmet	Unmet	Unmet	Met	Unmet	Unmet	Unmet	99	17	0.171717
High_Met	Met	Met	Unmet	Unmet	Unmet	Unmet	Unmet	Unmet	Unmet	Met	Unmet	Unmet	70	12	0.171429
Met	High_Met	Met	Met	Met	High_Met	High_Met	High_Met	High_Met	High_Met	High_Met	High_Met	High_Met	70	12	0.171429
Met	High_Met	Unmet	Met	Met	Unmet	Unmet	Unmet	Unmet	Unmet	Unmet	Unmet	Unmet	304	52	0.171053
High_Met	Unmet	Unmet	Unmet	Unmet	Unmet	Met	Unmet	Unmet	Unmet	Unmet	Unmet	Unmet	1833	313	0.170758
High_Met	High_Met	High_Met	High_Met	High_Met	Unmet	Unmet	Unmet	Unmet	Unmet	Unmet	Unmet	Unmet	651	111	0.170507
High_Met	Met	High_Met	Unmet	Unmet	Unmet	Unmet	Unmet	Unmet	Unmet	Unmet	Unmet	Unmet	88	15	0.170455
High_Met	Met	Met	Met	High_Met	Unmet	Unmet	Unmet	Unmet	Unmet	Unmet	Unmet	Unmet	188	32	0.170213
Met	Unmet	Met	Unmet	Unmet	Met	Unmet	Unmet	Unmet	Unmet	Unmet	Unmet	Unmet	94	16	0.170213
High_Met	High_Met	Met	Met	Met	Unmet	Unmet	Unmet	Met	Unmet	Unmet	Unmet	Unmet	390	66	0.169231
High_Met	Met	Met	Met	Met	Met	Met	Unmet	Unmet	Unmet	Unmet	Met	Unmet	71	12	0.169014
High_Met	High_Met	Unmet	Met	Met	Met	Unmet	Unmet	Unmet	Unmet	Unmet	Unmet	Unmet	934	157	0.168094
High_Met	High_Met	High_Met	High_Met	Met	Unmet	Unmet	Unmet	Unmet	Unmet	Unmet	Met	Unmet	336	56	0.166667
High_Met	High_Met	High_Met	High_Met	Met	Unmet	Unmet	Met	Unmet	Unmet	Unmet	Unmet	Unmet	108	18	0.166667
High_Met	High_Met	High_Met	Met	Met	Met	Met	Unmet	Unmet	Met	Unmet	Met	Unmet	102	17	0.166667
High_Met	High_Met	Met	Met	High_Met	Unmet	Unmet	Unmet	Unmet	Unmet	Unmet	Met	Unmet	132	22	0.166667
High_Met	Met	Unmet	Unmet	Unmet	Unmet	Unmet	Unmet	Met	Unmet	Unmet	Unmet	Unmet	78	13	0.166667
High_Met	Met	Unmet	High_Met	Met	Unmet	Unmet	Unmet	Unmet	Unmet	Unmet	Unmet	Unmet	96	16	0.166667
High_Met	Met	Unmet	Unmet	Met	Unmet	Unmet	Unmet	Unmet	Unmet	Unmet	Met	Unmet	132	22	0.166667
High_Met	Unmet	Unmet	Unmet	Unmet	Unmet	Unmet	Unmet	Unmet	Unmet	Unmet	Unmet	Met	555	92	0.165766
High_Met	High_Met	High_Met	High_Met	High_Met	Met	Unmet	Unmet	Unmet	Unmet	Unmet	Unmet	Unmet	471	78	0.165605
High_Met	High_Met	Met	High_Met	High_Met	Met	Met	Unmet	Unmet	Unmet	Unmet	Unmet	Unmet	97	16	0.164948
High_Met	High_Met	Met	Met	Met	Met	Unmet	Met	Unmet	Unmet	Unmet	Met	Unmet	79	13	0.164557
High_Met	Unmet	Unmet	Unmet	Unmet	Met	Unmet	Unmet	Unmet	Met	Unmet	Met	Unmet	73	12	0.164384
High_Met	High_Met	Met	Met	Met	Met	Met	Unmet	Unmet	Met	Met	Unmet	Unmet	73	12	0.164384
High_Met	Met	Met	Met	Met	Unmet	Unmet	Unmet	Unmet	Unmet	Unmet	Met	Unmet	483	79	0.163561
Met	High_Met	High_Met	Met	Unmet	Unmet	Unmet	Unmet	Unmet	Unmet	Unmet	Unmet	Unmet	86	14	0.162791
High_Met	Met	Met	Met	Met	Met	Unmet	Unmet	Unmet	Met	Unmet	Unmet	Unmet	185	30	0.162162
High_Met	Met	Unmet	Met	Unmet	Unmet	Unmet	Met	Unmet	Unmet	Unmet	Unmet	Unmet	68	11	0.161765
High_Met	High_Met	Met	Met	High_Met	Unmet	Met	Unmet	Unmet	Unmet	Unmet	Unmet	Unmet	130	21	0.161538
High_Met	High_Met	Unmet	Met	Met	Unmet	Unmet	Unmet	Unmet	Unmet	Unmet	Unmet	Met	93	15	0.16129
High_Met	Unmet	Unmet	Met	Met	Unmet	Met	Unmet	Unmet	Unmet	Unmet	Unmet	Unmet	174	28	0.16092
High_Met	Met	Met	Unmet	Unmet	Unmet	Unmet	Unmet	Unmet	Unmet	Unmet	Unmet	Met	87	14	0.16092
High_Met	Met	Met	Met	Unmet	Unmet	Unmet	Unmet	Unmet	Unmet	Met	Unmet	Unmet	87	14	0.16092
High_Met	Met	Unmet	Unmet	Unmet	Unmet	Met	Unmet	Unmet	Unmet	Unmet	Unmet	Unmet	690	111	0.16087
High_Met	Met	High_Met	Met	Unmet	Unmet	Unmet	Unmet	Unmet	Unmet	Unmet	Unmet	Unmet	411	66	0.160584
High_Met	Unmet	Met	Unmet	Unmet	Met	Unmet	Unmet	Unmet	Met	Unmet	Unmet	Unmet	131	21	0.160305
High_Met	Met	Met	Met	Met	Unmet	Unmet	Unmet	Unmet	Unmet	Met	Unmet	Unmet	150	24	0.16
High_Met	High_Met	High_Met	Met	Met	Met	Unmet	Unmet	Unmet	Unmet	Met	Unmet	Unmet	194	31	0.159794
High_Met	Met	Unmet	Unmet	Unmet	Unmet	Unmet	Unmet	Unmet	Unmet	Met	Unmet	Unmet	188	30	0.159574
High_Met	Unmet	Unmet	Met	Unmet	Unmet	Unmet	Unmet	Unmet	Unmet	Unmet	Unmet	Met	132	21	0.159091
High_Met	Unmet	Met	Unmet	Unmet	Unmet	Unmet	Met	Unmet	Unmet	Unmet	Unmet	Unmet	132	21	0.159091
High_Met	High_Met	Met	Met	Unmet	Unmet	Met	Unmet	Unmet	Unmet	Unmet	Unmet	Unmet	673	107	0.15899
High_Met	High_Met	Met	Met	Met	Met	Met	Unmet	Unmet	Met	Met	Met	Unmet	82	13	0.158537
High_Met	Met	Met	Unmet	Unmet	Met	Unmet	Unmet	Unmet	Unmet	Unmet	Met	Unmet	101	16	0.158416
High_Met	Unmet	Met	Unmet	Unmet	Unmet	Unmet	Unmet	Met	Unmet	Unmet	Unmet	Unmet	76	12	0.157895
High_Met	Met	Unmet	Met	Met	Met	Unmet	Unmet	Unmet	Unmet	Unmet	Unmet	Unmet	532	84	0.157895
High_Met	Met	Met	Met	Unmet	Met	Unmet	Unmet	Unmet	Unmet	Unmet	Met	Unmet	95	15	0.157895
High_Met	Unmet	Unmet	Met	Met	Met	Unmet	Unmet	Unmet	Unmet	Unmet	Met	Unmet	89	14	0.157303
Met	High_Met	Met	Met	Met	Met	Met	Unmet	Unmet	Unmet	Unmet	Unmet	Unmet	70	11	0.157143
High_Met	High_Met	Met	Met	Met	Met	Unmet	Met	Unmet	Met	Unmet	Unmet	Unmet	64	10	0.15625
High_Met	Met	Met	Met	Met	Met	Unmet	Unmet	Unmet	Met	Unmet	Met	Unmet	64	10	0.15625
Met	High_Met	Met	Met	Met	Met	Unmet	Unmet	Unmet	Unmet	Unmet	Unmet	Unmet	340	53	0.155882
High_Met	Met	Met	Met	Met	Met	Unmet	Met	Unmet	Unmet	Unmet	Unmet	Unmet	77	12	0.155844
High_Met	High_Met	High_Met	High_Met	Met	Unmet	Unmet	Unmet	Unmet	Met	Unmet	Unmet	Unmet	199	31	0.155779
High_Met	High_Met	High_Met	High_Met	Met	Met	Met	Unmet	Unmet	Met	Unmet	Unmet	Unmet	90	14	0.155556
High_Met	High_Met	Met	High_Met	Met	Met	Met	Unmet	Unmet	Met	Unmet	Unmet	Unmet	90	14	0.155556
High_Met	High_Met	Met	High_Met	High_Met	Unmet	Unmet	Unmet	Unmet	Unmet	Unmet	Unmet	Unmet	708	110	0.155367
High_Met	Unmet	Unmet	Unmet	Unmet	Unmet	Met	Unmet	Unmet	Unmet	Unmet	Met	Unmet	142	22	0.15493
High_Met	Met	Met	Met	Met	Unmet	Unmet	Unmet	Unmet	Unmet	Unmet	Unmet	Met	123	19	0.154472
Met	High_Met	Met	Met	Met	Unmet	Met	Unmet	Unmet	Unmet	Unmet	Unmet	Unmet	78	12	0.153846
High_Met	Unmet	Unmet	Unmet	Met	Unmet	Unmet	Unmet	Unmet	Unmet	Met	Unmet	Unmet	111	17	0.153153
High_Met	High_Met	Met	Met	Met	Met	Met	Unmet	Met	Met	Unmet	Unmet	Unmet	72	11	0.152778
High_Met	Met	Unmet	Met	Unmet	Unmet	Unmet	Unmet	Unmet	Unmet	Met	Unmet	Unmet	72	11	0.152778
High_Met	Unmet	Unmet	Met	Unmet	Met	Met	Unmet	Unmet	Unmet	Unmet	Unmet	Unmet	230	35	0.152174
High_Met	High_Met	Met	High_Met	Met	Met	Unmet	Unmet	Met	Unmet	Unmet	Unmet	Unmet	79	12	0.151899
Met	High_Met	Unmet	Met	Unmet	Unmet	Unmet	Unmet	Unmet	Unmet	Unmet	Unmet	Unmet	303	46	0.151815
High_Met	High_Met	Met	Met	Met	Met	Met	Unmet	Met	Unmet	Unmet	Unmet	Unmet	99	15	0.151515
High_Met	Met	Met	Met	Met	Unmet	Unmet	Unmet	Unmet	Met	Unmet	Unmet	Unmet	238	36	0.151261
High_Met	High_Met	Unmet	Met	Met	Unmet	Unmet	Unmet	Unmet	Unmet	Unmet	Met	Unmet	338	51	0.150888
Met	High_Met	High_Met	Met	Met	Unmet	Unmet	Unmet	Unmet	Unmet	Unmet	Unmet	Unmet	293	44	0.150171
High_Met	High_Met	High_Met	High_Met	High_Met	Met	Met	Unmet	Unmet	Unmet	Unmet	Unmet	Unmet	120	18	0.15
High_Met	High_Met	Met	Met	High_Met	Met	Met	Unmet	Unmet	Unmet	Unmet	Unmet	Unmet	127	19	0.149606
High_Met	Met	High_Met	High_Met	High_Met	High_Met	High_Met	High_Met	High_Met	High_Met	High_Met	High_Met	High_Met	107	16	0.149533
High_Met	High_Met	Met	Unmet	Unmet	Unmet	Unmet	Unmet	Unmet	Met	Unmet	Unmet	Unmet	67	10	0.149254
Met	Unmet	Unmet	Unmet	Unmet	Unmet	Unmet	Unmet	Unmet	Unmet	Unmet	Unmet	Met	81	12	0.148148
High_Met	Unmet	Unmet	Unmet	Unmet	Unmet	Unmet	Unmet	Unmet	Unmet	Met	Unmet	Unmet	581	86	0.148021
High_Met	Unmet	Met	Met	Unmet	Unmet	Met	Unmet	Unmet	Unmet	Unmet	Unmet	Unmet	277	41	0.148014
High_Met	High_Met	Met	Met	Met	Met	Met	Unmet	Unmet	Unmet	Met	Met	Unmet	68	10	0.147059
Met	Met	Unmet	Unmet	Unmet	Met	Unmet	Unmet	Unmet	Unmet	Unmet	Unmet	Unmet	254	37	0.145669
High_Met	Unmet	Met	Unmet	Met	Met	Met	Unmet	Unmet	Unmet	Unmet	Unmet	Unmet	110	16	0.145455
High_Met	Met	Met	Met	Met	Met	Unmet	Unmet	Met	Unmet	Unmet	Unmet	Unmet	69	10	0.144928
High_Met	High_Met	High_Met	Met	Unmet	Met	Unmet	Unmet	Unmet	Unmet	Unmet	Unmet	Unmet	394	57	0.14467
High_Met	High_Met	High_Met	Unmet	Unmet	Unmet	Unmet	Unmet	Unmet	Unmet	Unmet	Unmet	Unmet	273	39	0.142857
Met	Unmet	Met	Met	Unmet	Unmet	Unmet	Unmet	Unmet	Unmet	Unmet	Unmet	Unmet	161	23	0.142857
High_Met	High_Met	Met	Met	Met	Met	Met	Met	Unmet	Unmet	Unmet	Unmet	Unmet	120	17	0.141667
Met	Unmet	Unmet	Unmet	Unmet	Unmet	Met	Unmet	Unmet	Unmet	Unmet	Unmet	Unmet	240	34	0.141667
Met	Unmet	Unmet	Met	Unmet	Met	Unmet	Unmet	Unmet	Unmet	Unmet	Unmet	Unmet	92	13	0.141304
High_Met	High_Met	Unmet	Met	Unmet	Unmet	Unmet	Unmet	Unmet	Unmet	Unmet	Met	Unmet	164	23	0.140244
High_Met	Met	High_Met	Met	Met	Unmet	Unmet	Unmet	Unmet	Unmet	Unmet	Met	Unmet	93	13	0.139785
High_Met	High_Met	High_Met	Met	Met	Met	Met	Unmet	Unmet	Met	Unmet	Unmet	Unmet	158	22	0.139241
High_Met	Met	Unmet	Unmet	Unmet	Unmet	Unmet	Met	Unmet	Unmet	Unmet	Unmet	Unmet	158	22	0.139241
High_Met	Met	Unmet	Met	Unmet	Unmet	Unmet	Unmet	Unmet	Unmet	Unmet	Unmet	Met	79	11	0.139241
High_Met	High_Met	High_Met	Met	High_Met	Unmet	Unmet	Unmet	Unmet	Unmet	Unmet	Met	Unmet	80	11	0.1375
High_Met	Met	Unmet	Met	Unmet	Unmet	Unmet	Unmet	Unmet	Unmet	Unmet	Met	Unmet	248	34	0.137097
High_Met	High_Met	High_Met	High_Met	Met	Met	Unmet	Unmet	Unmet	Unmet	Unmet	Unmet	Met	73	10	0.136986
Met	Met	Unmet	Unmet	Met	Unmet	Unmet	Unmet	Unmet	Unmet	Unmet	Unmet	Unmet	205	28	0.136585
High_Met	High_Met	High_Met	Met	Unmet	Unmet	Unmet	Unmet	Unmet	Met	Unmet	Unmet	Unmet	81	11	0.135802
High_Met	High_Met	Met	Unmet	Met	Unmet	Unmet	Unmet	Unmet	Met	Unmet	Unmet	Unmet	81	11	0.135802
Unmet	High_Met	Met	Met	Met	Unmet	Met	Unmet	Unmet	Unmet	Unmet	Unmet	Unmet	81	11	0.135802
High_Met	High_Met	Met	Met	Met	Unmet	Met	Unmet	Unmet	Unmet	Unmet	Unmet	Met	81	11	0.135802
Met	Met	Met	Unmet	Unmet	Unmet	Unmet	Unmet	Unmet	Unmet	Unmet	Unmet	Unmet	419	56	0.133652
High_Met	High_Met	High_Met	High_Met	Met	Met	Met	Met	Met	Met	Met	Met	Unmet	90	12	0.133333
Met	High_Met	High_Met	Met	Met	Met	Unmet	Unmet	Unmet	Unmet	Unmet	Unmet	Unmet	75	10	0.133333
High_Met	High_Met	Met	Met	Met	Met	Unmet	Unmet	Unmet	Met	Met	Unmet	Unmet	98	13	0.132653
High_Met	Met	Met	Unmet	Unmet	Met	Unmet	Unmet	Unmet	Met	Unmet	Unmet	Unmet	77	10	0.12987
High_Met	Unmet	Unmet	Met	Met	Met	Met	Unmet	Unmet	Unmet	Unmet	Unmet	Unmet	108	14	0.12963
Met	Unmet	Unmet	Unmet	Unmet	Met	Unmet	Unmet	Unmet	Unmet	Unmet	Unmet	Unmet	656	85	0.129573
Met	High_Met	Met	Unmet	Met	Unmet	Unmet	Unmet	Unmet	Unmet	Unmet	Unmet	Unmet	212	27	0.127358
Met	High_Met	Met	Met	Unmet	Unmet	Unmet	Unmet	Unmet	Unmet	Unmet	Unmet	Unmet	783	99	0.126437
High_Met	High_Met	Met	Met	Met	Met	Unmet	Unmet	Unmet	Unmet	Unmet	Met	Met	80	10	0.125
Met	High_Met	Met	Met	Met	Unmet	Unmet	Unmet	Unmet	Unmet	Unmet	Unmet	Unmet	1571	196	0.124761
Met	Met	Met	Met	Met	Unmet	Unmet	Unmet	Unmet	Unmet	Unmet	Unmet	Unmet	492	61	0.123984
High_Met	Met	Met	Met	Unmet	Unmet	Unmet	Unmet	Unmet	Met	Unmet	Unmet	Unmet	146	18	0.123288
High_Met	Unmet	Met	Met	Met	Met	Unmet	Unmet	Unmet	Met	Unmet	Unmet	Unmet	91	11	0.120879
High_Met	High_Met	Unmet	Met	Met	Met	Unmet	Unmet	Unmet	Unmet	Unmet	Met	Unmet	100	12	0.12
High_Met	Unmet	Unmet	Met	Unmet	Met	Unmet	Unmet	Unmet	Unmet	Unmet	Met	Unmet	160	19	0.11875
Met	High_Met	Met	Unmet	Unmet	Unmet	Unmet	Unmet	Unmet	Unmet	Unmet	Unmet	Unmet	295	35	0.118644
Unmet	Met	Unmet	Unmet	Unmet	Met	Met	Unmet	Unmet	Unmet	Unmet	Unmet	Unmet	171	20	0.116959
Met	Met	Met	Met	Unmet	Unmet	Unmet	Unmet	Unmet	Unmet	Unmet	Unmet	Unmet	424	49	0.115566
High_Met	Met	Met	Met	Met	Met	Unmet	Unmet	Unmet	Unmet	Unmet	Met	Unmet	266	30	0.112782
Met	High_Met	Unmet	Unmet	Met	Unmet	Unmet	Unmet	Unmet	Unmet	Unmet	Unmet	Unmet	107	12	0.11215
High_Met	High_Met	Met	Unmet	Unmet	Unmet	Met	Unmet	Unmet	Unmet	Unmet	Unmet	Unmet	170	19	0.111765
Met	Met	Unmet	Met	Met	Unmet	Unmet	Unmet	Unmet	Unmet	Unmet	Unmet	Unmet	198	22	0.111111
Met	Met	Unmet	Unmet	Unmet	Unmet	Unmet	Unmet	Unmet	Unmet	Unmet	Unmet	Unmet	1810	201	0.11105
Met	High_Met	Met	Met	Met	Unmet	Unmet	Unmet	Unmet	Unmet	Unmet	Met	Unmet	100	11	0.11
Met	Unmet	Unmet	Met	Met	Unmet	Unmet	Unmet	Unmet	Unmet	Unmet	Unmet	Unmet	101	11	0.108911
Met	Unmet	Met	Unmet	Unmet	Unmet	Unmet	Unmet	Unmet	Unmet	Unmet	Unmet	Unmet	700	76	0.108571
Met	Unmet	Unmet	Unmet	Met	Unmet	Unmet	Unmet	Unmet	Unmet	Unmet	Unmet	Unmet	380	41	0.107895
Met	Unmet	Unmet	Unmet	Unmet	Unmet	Unmet	Unmet	Unmet	Unmet	Unmet	Unmet	Unmet	6323	678	0.107228
Unmet	High_Met	Met	Met	Unmet	Met	Unmet	Unmet	Unmet	Unmet	Unmet	Unmet	Unmet	104	11	0.105769
Unmet	High_Met	Unmet	Met	Met	Met	Unmet	Unmet	Unmet	Unmet	Unmet	Unmet	Unmet	95	10	0.105263
Met	Unmet	Met	Met	Met	Unmet	Unmet	Unmet	Unmet	Unmet	Unmet	Unmet	Unmet	97	10	0.103093
Unmet	Met	Unmet	Unmet	Unmet	Unmet	Met	Unmet	Unmet	Unmet	Unmet	Unmet	Unmet	186	19	0.102151
Met	Unmet	Unmet	Unmet	Unmet	Unmet	Unmet	Unmet	Unmet	Unmet	Unmet	Met	Unmet	216	22	0.101852
Met	Unmet	Unmet	Unmet	Unmet	Unmet	Unmet	Unmet	Unmet	Met	Unmet	Unmet	Unmet	111	11	0.0990991
Unmet	High_Met	Met	Met	Met	Unmet	Unmet	Unmet	Unmet	Unmet	Unmet	Met	Unmet	112	11	0.0982143
Unmet	High_Met	Met	Unmet	Unmet	Unmet	Unmet	Unmet	Unmet	Unmet	Unmet	Unmet	Unmet	472	45	0.095339
Met	High_Met	Unmet	Unmet	Unmet	Unmet	Unmet	Unmet	Unmet	Unmet	Unmet	Unmet	Unmet	456	43	0.0942982
Met	Met	Met	Unmet	Met	Unmet	Unmet	Unmet	Unmet	Unmet	Unmet	Unmet	Unmet	149	14	0.0939597
Unmet	Unmet	Unmet	Unmet	Unmet	Met	Unmet	Unmet	Unmet	Unmet	Unmet	Met	Unmet	213	20	0.0938967
Unmet	High_Met	Met	Unmet	Met	Unmet	Unmet	Unmet	Unmet	Unmet	Unmet	Unmet	Unmet	363	34	0.0936639
Met	Met	Unmet	Met	Unmet	Unmet	Unmet	Unmet	Unmet	Unmet	Unmet	Unmet	Unmet	376	35	0.0930851
Unmet	Met	Met	Met	Met	Unmet	Unmet	Unmet	Unmet	Unmet	Unmet	Unmet	Unmet	335	31	0.0925373
Met	Met	Unmet	Unmet	Unmet	Unmet	Met	Unmet	Unmet	Unmet	Unmet	Unmet	Unmet	111	10	0.0900901
Unmet	High_Met	Unmet	Met	Met	Unmet	Unmet	Unmet	Unmet	Unmet	Unmet	Unmet	Unmet	521	46	0.0882917
Unmet	High_Met	Unmet	Unmet	Met	Unmet	Unmet	Unmet	Unmet	Unmet	Unmet	Unmet	Unmet	228	20	0.0877193
Met	Unmet	Unmet	Unmet	Unmet	Met	Met	Unmet	Unmet	Unmet	Unmet	Unmet	Unmet	115	10	0.0869565
Unmet	High_Met	Met	Met	Unmet	Unmet	Unmet	Unmet	Unmet	Unmet	Unmet	Unmet	Unmet	841	70	0.0832342
Unmet	High_Met	Met	Met	Met	Met	Unmet	Unmet	Unmet	Unmet	Unmet	Unmet	Unmet	431	35	0.0812065
Unmet	Unmet	Unmet	Unmet	Unmet	Unmet	Unmet	Unmet	Unmet	Unmet	Unmet	Met	Unmet	643	52	0.0808709
Met	High_Met	Met	Met	Met	Met	Met	Met	Met	Met	Met	Met	Met	287	23	0.0801394
Met	Unmet	Unmet	Met	Unmet	Unmet	Unmet	Unmet	Unmet	Unmet	Unmet	Unmet	Unmet	556	44	0.0791367
Unmet	High_Met	High_Met	Met	Met	Unmet	Unmet	Unmet	Unmet	Unmet	Unmet	Unmet	Unmet	270	21	0.0777778
Unmet	Met	Unmet	Unmet	Met	Unmet	Unmet	Unmet	Unmet	Unmet	Unmet	Unmet	Unmet	207	16	0.0772947
Unmet	High_Met	Met	Met	Met	Unmet	Unmet	Unmet	Unmet	Unmet	Unmet	Unmet	Unmet	1962	151	0.0769623
Unmet	Met	Met	Unmet	Unmet	Unmet	Unmet	Unmet	Unmet	Unmet	Unmet	Unmet	Unmet	393	30	0.0763359
Unmet	Unmet	Unmet	Unmet	Unmet	Met	Met	Unmet	Unmet	Unmet	Unmet	Unmet	Unmet	374	28	0.0748663
Unmet	Unmet	Unmet	Unmet	Unmet	Unmet	Met	Unmet	Unmet	Unmet	Unmet	Unmet	Unmet	588	43	0.0731293
Unmet	Met	Unmet	Met	Met	Unmet	Unmet	Unmet	Unmet	Unmet	Unmet	Unmet	Unmet	193	14	0.0725389
Unmet	Unmet	Unmet	Unmet	Unmet	Met	Unmet	Unmet	Unmet	Unmet	Unmet	Unmet	Unmet	1702	123	0.0722679
Unmet	Met	Unmet	Met	Unmet	Unmet	Unmet	Unmet	Unmet	Unmet	Unmet	Unmet	Unmet	349	25	0.0716332
Unmet	Met	Unmet	Unmet	Unmet	Met	Unmet	Unmet	Unmet	Unmet	Unmet	Unmet	Unmet	613	38	0.0619902
Unmet	Unmet	Unmet	Unmet	Unmet	Unmet	Unmet	Unmet	Unmet	Unmet	Met	Unmet	Unmet	261	16	0.0613027
Unmet	Met	Unmet	Unmet	Unmet	Unmet	Unmet	Unmet	Unmet	Unmet	Unmet	Unmet	Unmet	5453	318	0.0583165
Unmet	Unmet	Unmet	Met	Unmet	Unmet	Unmet	Unmet	Unmet	Unmet	Unmet	Unmet	Unmet	378	22	0.0582011
Unmet	Unmet	Unmet	Unmet	Unmet	Unmet	Unmet	Met	Unmet	Unmet	Unmet	Unmet	Unmet	278	16	0.057554
Unmet	High_Met	Unmet	Met	Unmet	Unmet	Unmet	Unmet	Unmet	Unmet	Unmet	Unmet	Unmet	453	26	0.0573951
Unmet	Unmet	Unmet	Unmet	Unmet	Unmet	Unmet	Unmet	Unmet	Met	Unmet	Unmet	Unmet	314	18	0.0573248
Unmet	Met	Met	Met	Unmet	Unmet	Unmet	Unmet	Unmet	Unmet	Unmet	Unmet	Unmet	316	18	0.056962
Unmet	Unmet	Unmet	Unmet	Unmet	Unmet	Unmet	Unmet	Unmet	Unmet	Unmet	Unmet	Met	242	13	0.053719
Unmet	Unmet	Met	Unmet	Unmet	Unmet	Unmet	Unmet	Unmet	Unmet	Unmet	Unmet	Unmet	522	28	0.0536398
Unmet	High_Met	Unmet	Unmet	Unmet	Unmet	Unmet	Unmet	Unmet	Unmet	Unmet	Unmet	Unmet	1256	65	0.0517516
Unmet	Unmet	Unmet	Unmet	Met	Unmet	Unmet	Unmet	Unmet	Unmet	Unmet	Unmet	Unmet	446	23	0.0515695
Unmet	Unmet	Unmet	Unmet	Unmet	Unmet	Unmet	Unmet	Unmet	Unmet	Unmet	Unmet	Unmet	54710	2449	0.0447633
Met	Met	Met	Met	Met	Met	Met	Met	Met	Met	Met	Met	Met	710	28	0.0394366
